# Supplementary material for: Asymmetric epoxidation of 2-arylidene-1,3-diketones: facile access to synthetically useful epoxides
Source: Royal Society of Chemistry journal article supplement (doi:10.1039/c002587a), 2010-01-01
Supplement: c002587a.pdf [file c002587a.pdf]

## **Electronic Supplementary Information**

### **Asymmetric Epoxidation of 2-Arylidene-1,3-Diketones: Facile Access to Synthetically Useful Epoxides**

Alessio Russo and Alessandra Lattanzi\*

*Dipartimento di Chimica, Università di Salerno, Via Ponte don Melillo, 84084, Fisciano, Italy*

*E-mail: [lattanzi@unisa.it](mailto:lattanzi@unisa.it)*

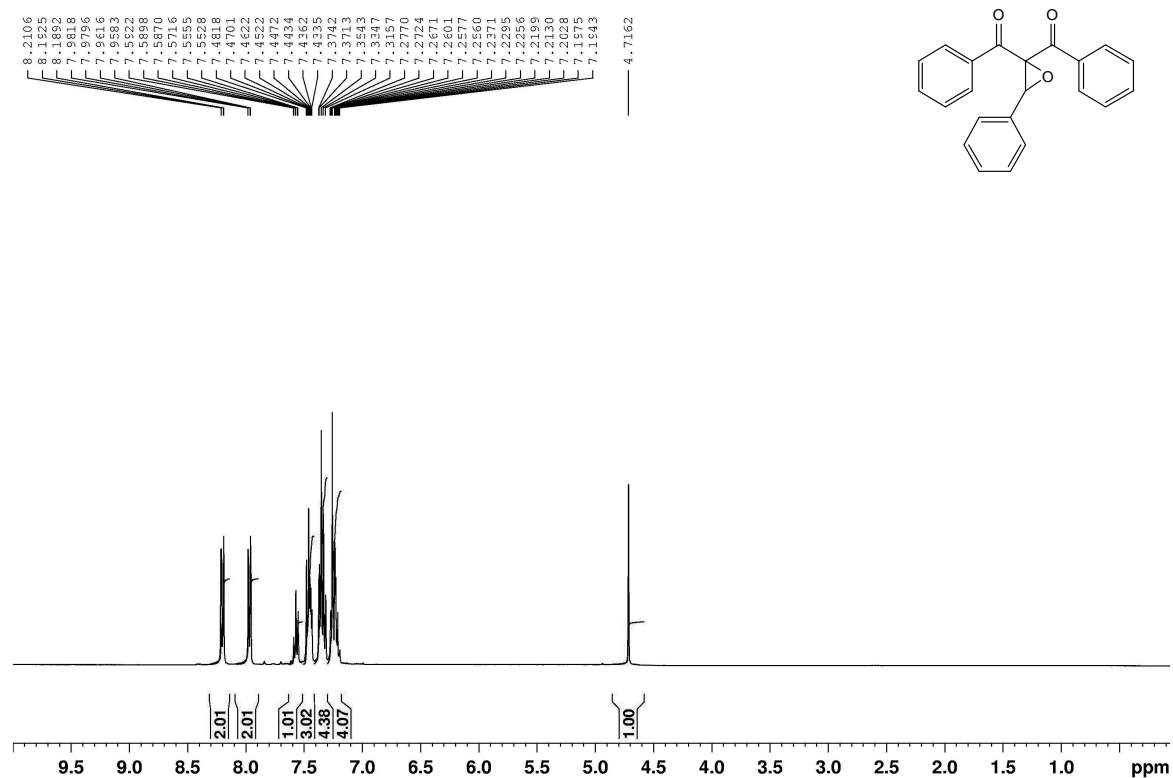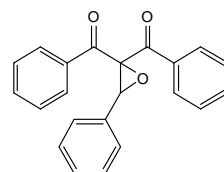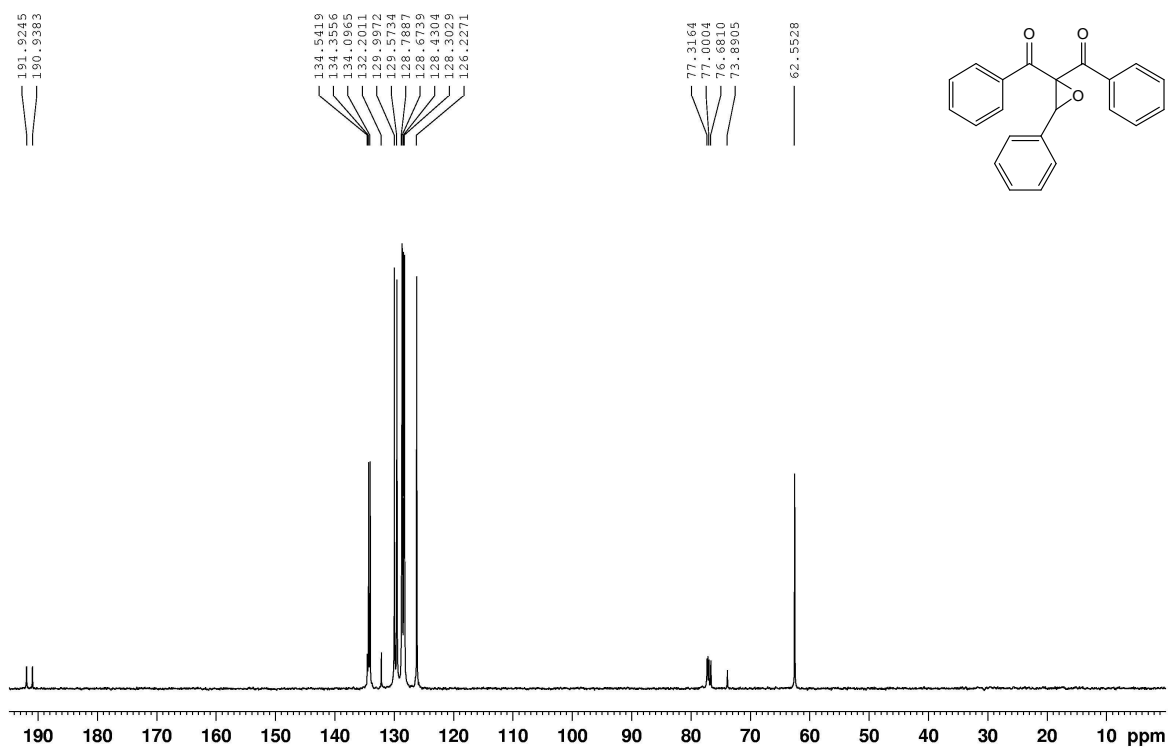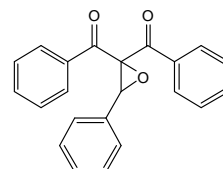

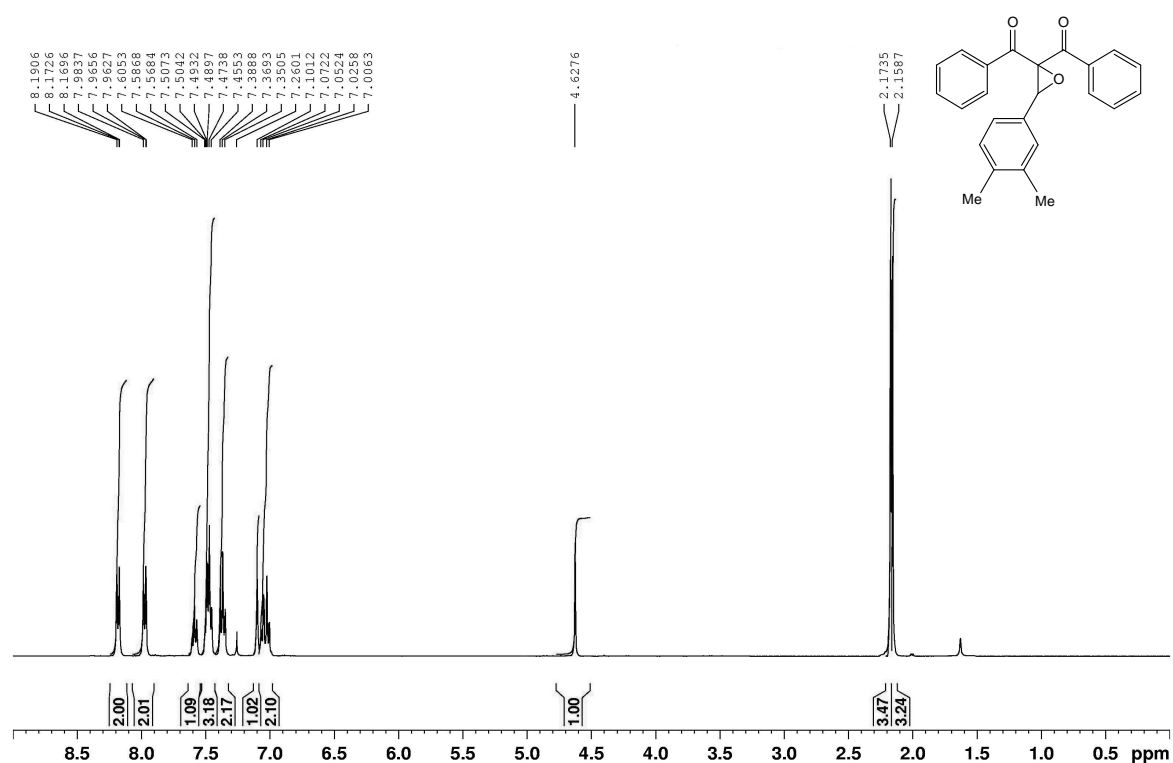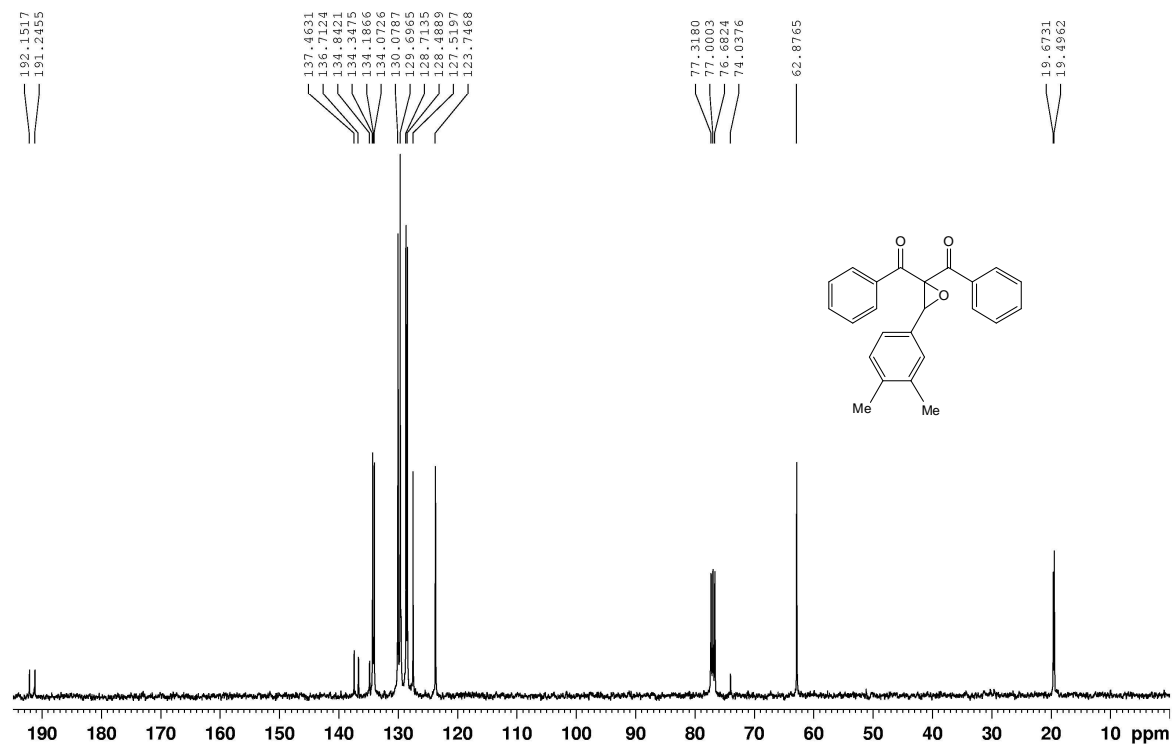

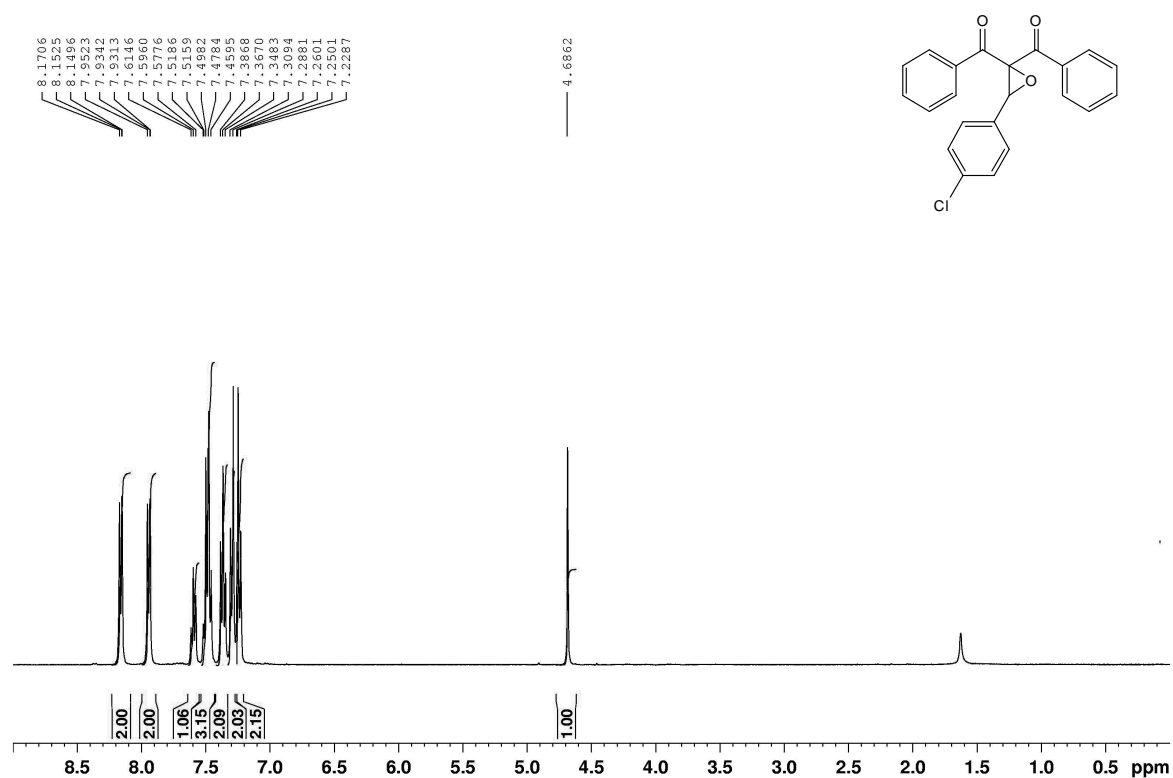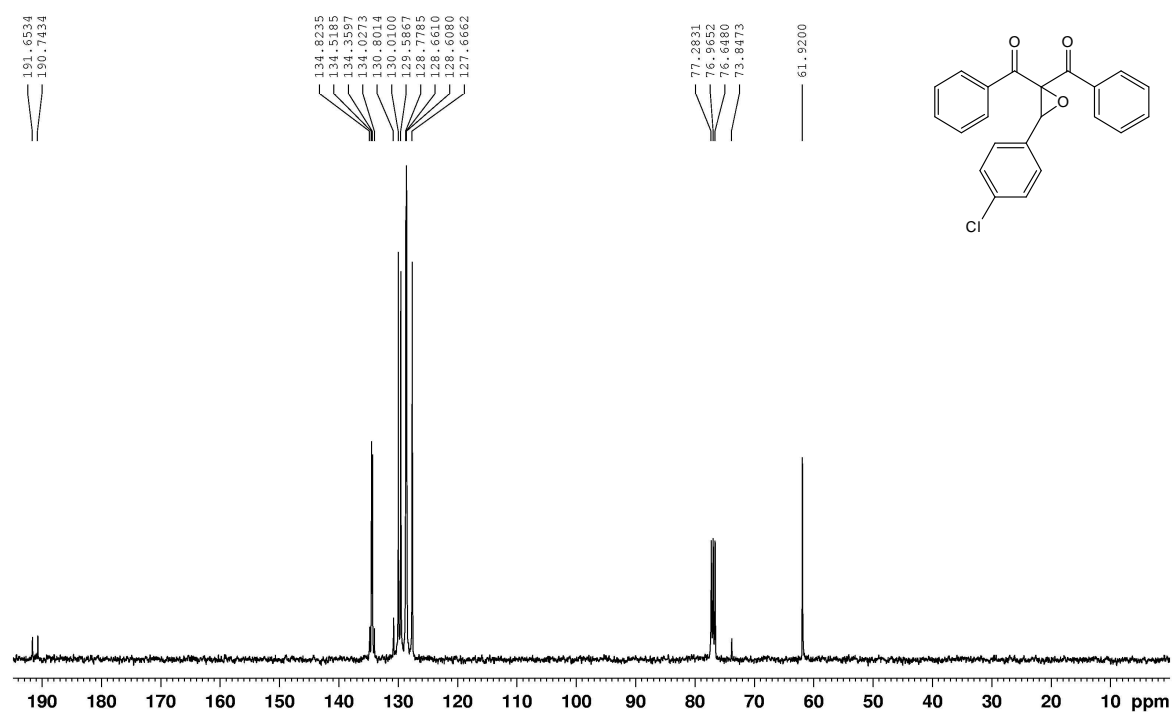

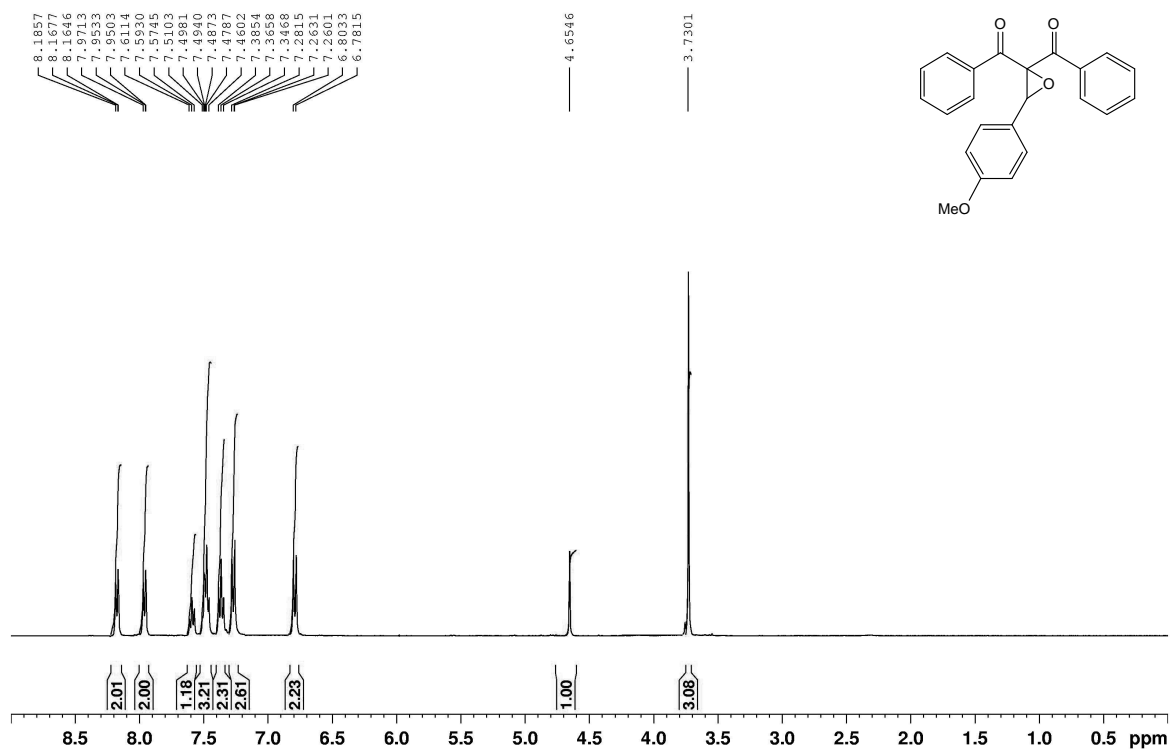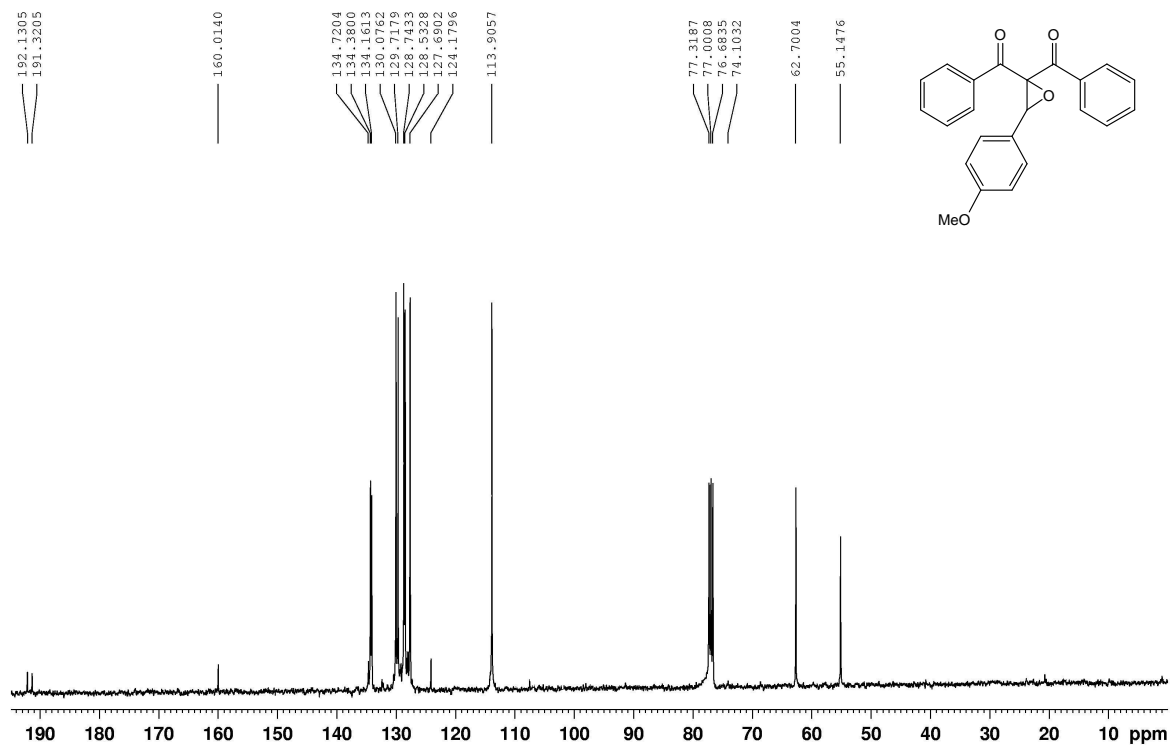

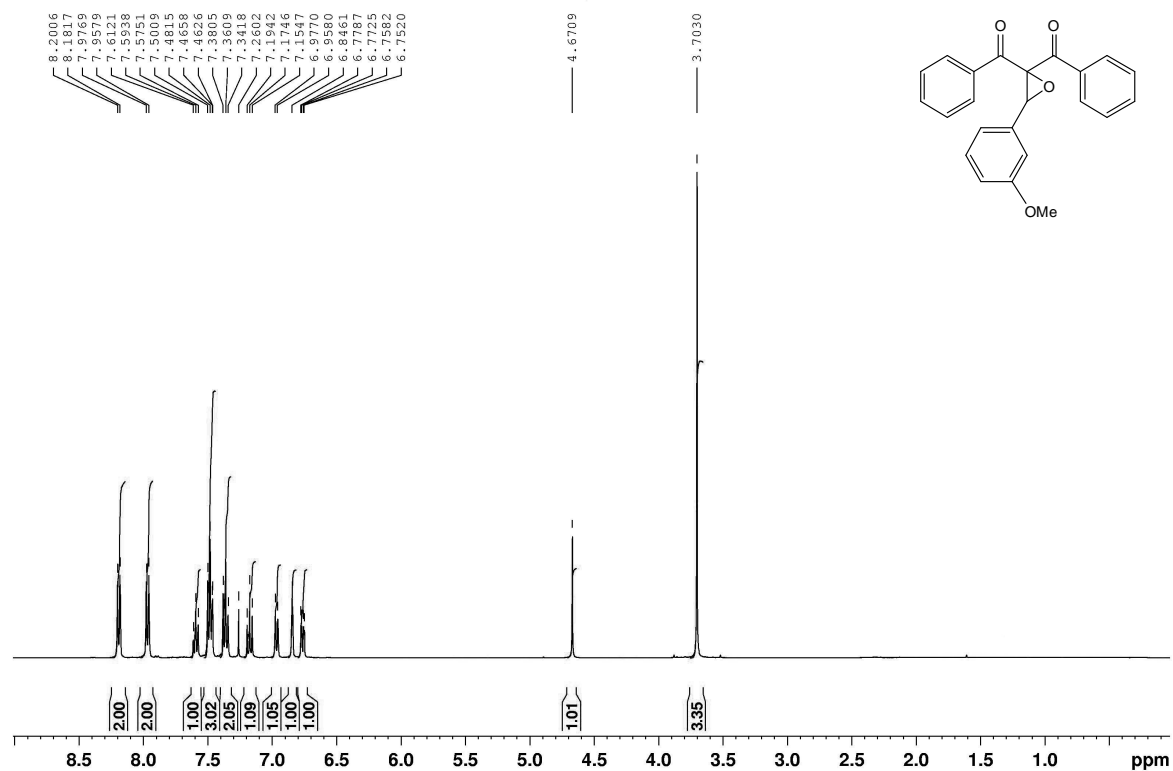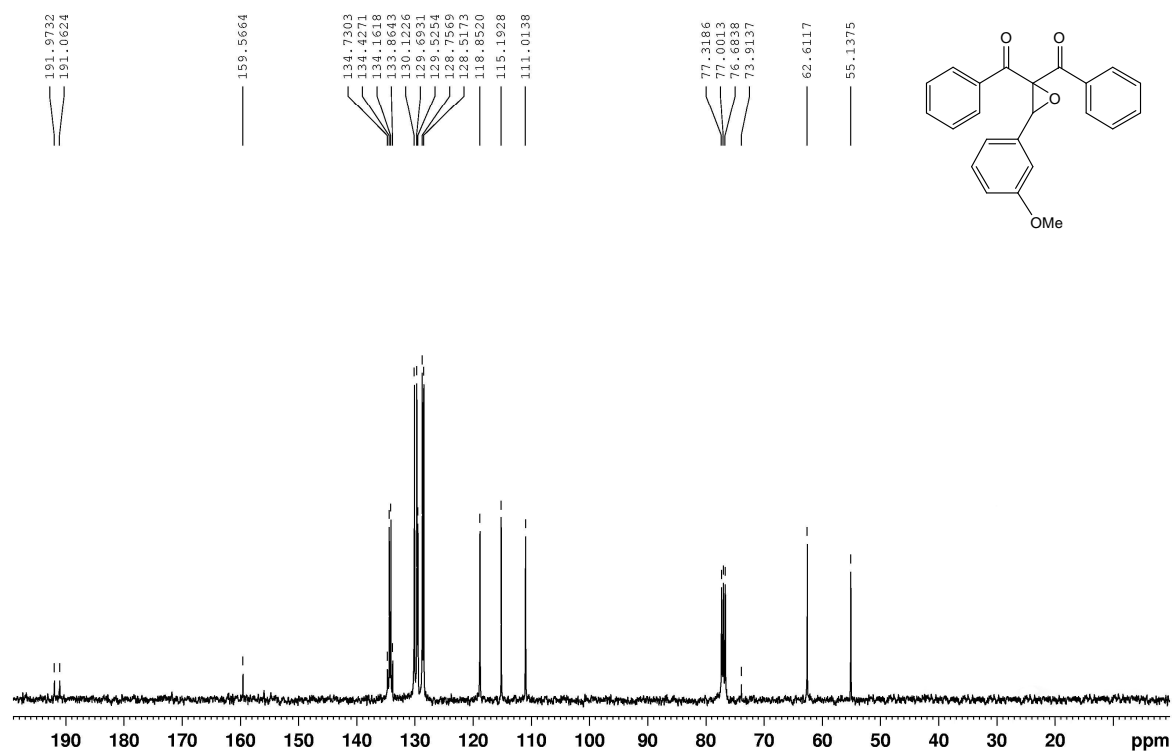

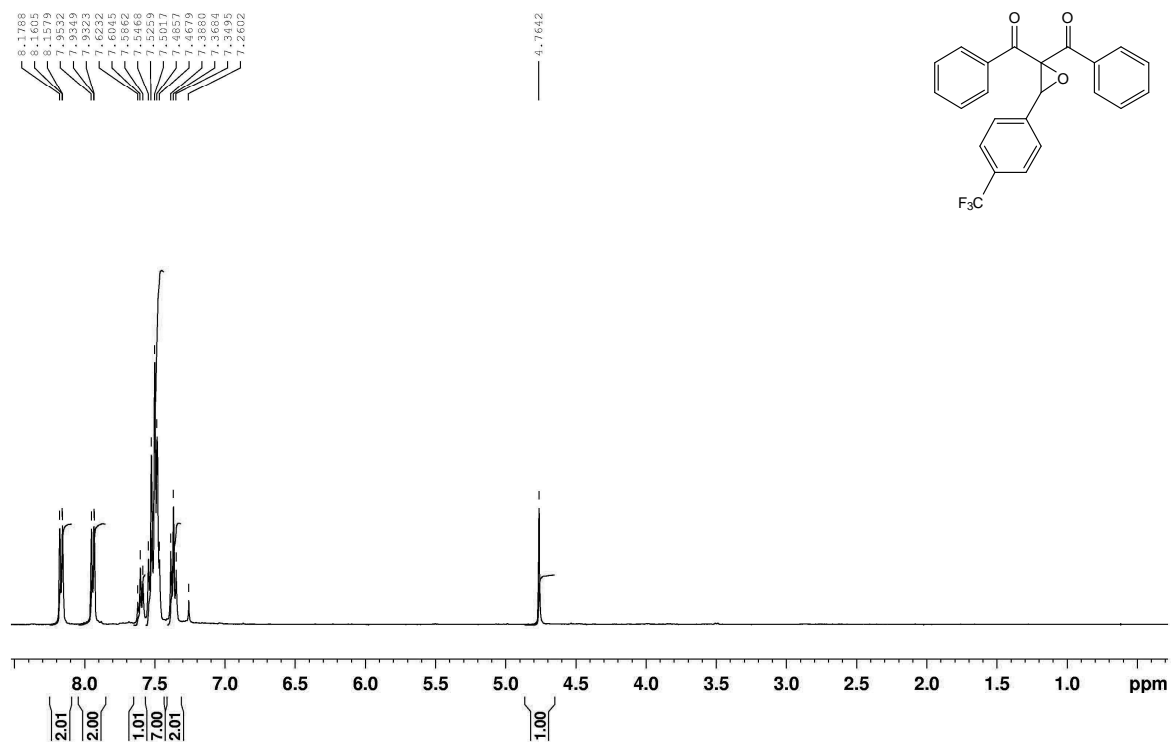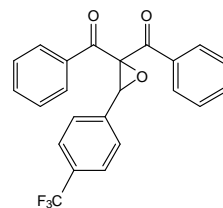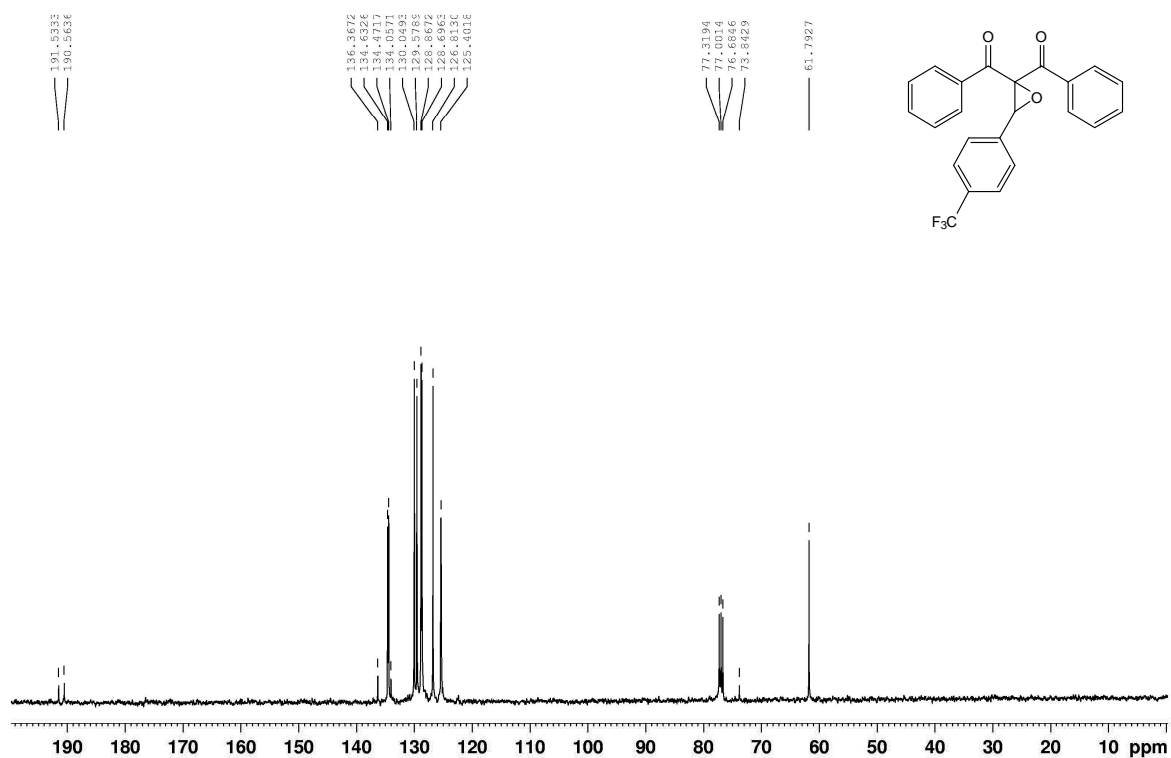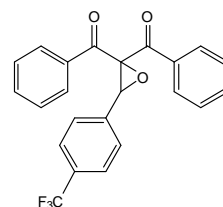

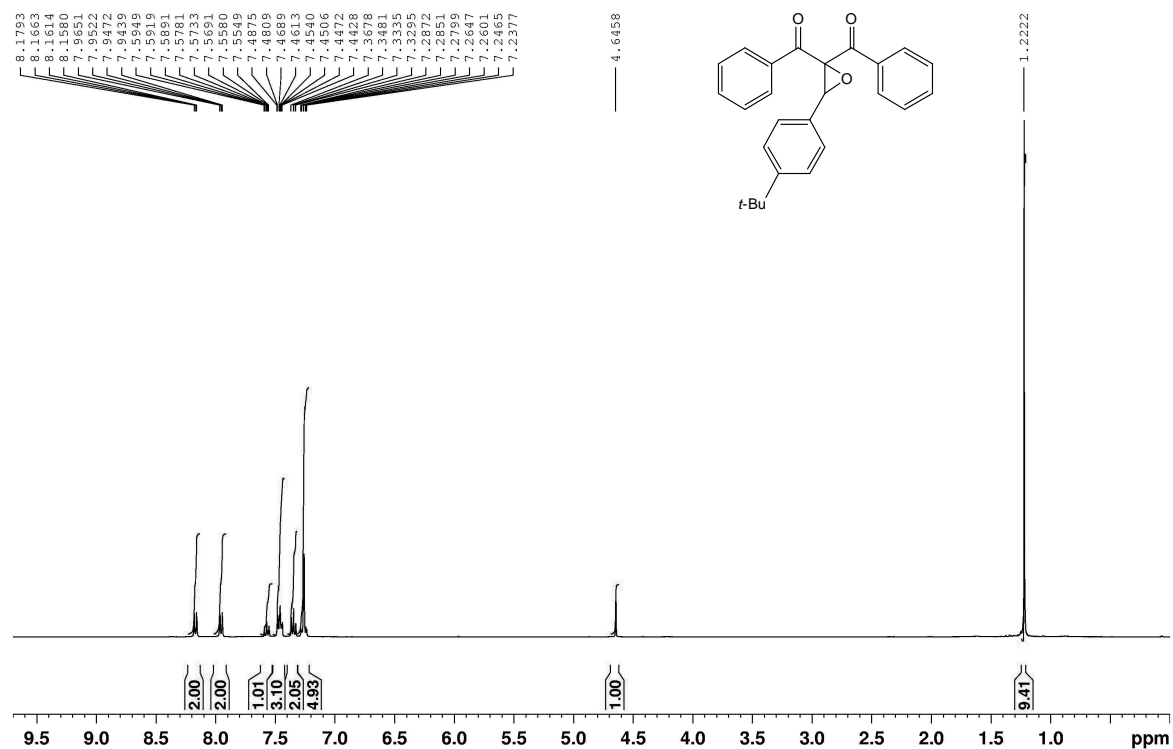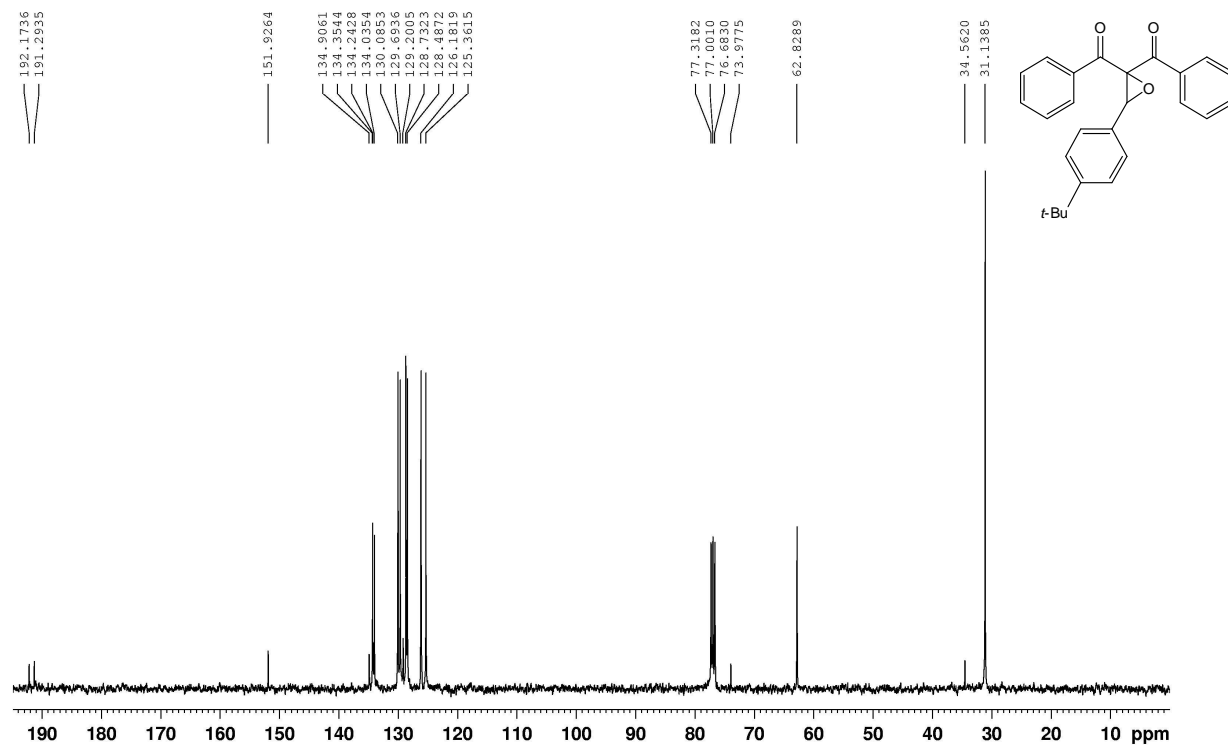



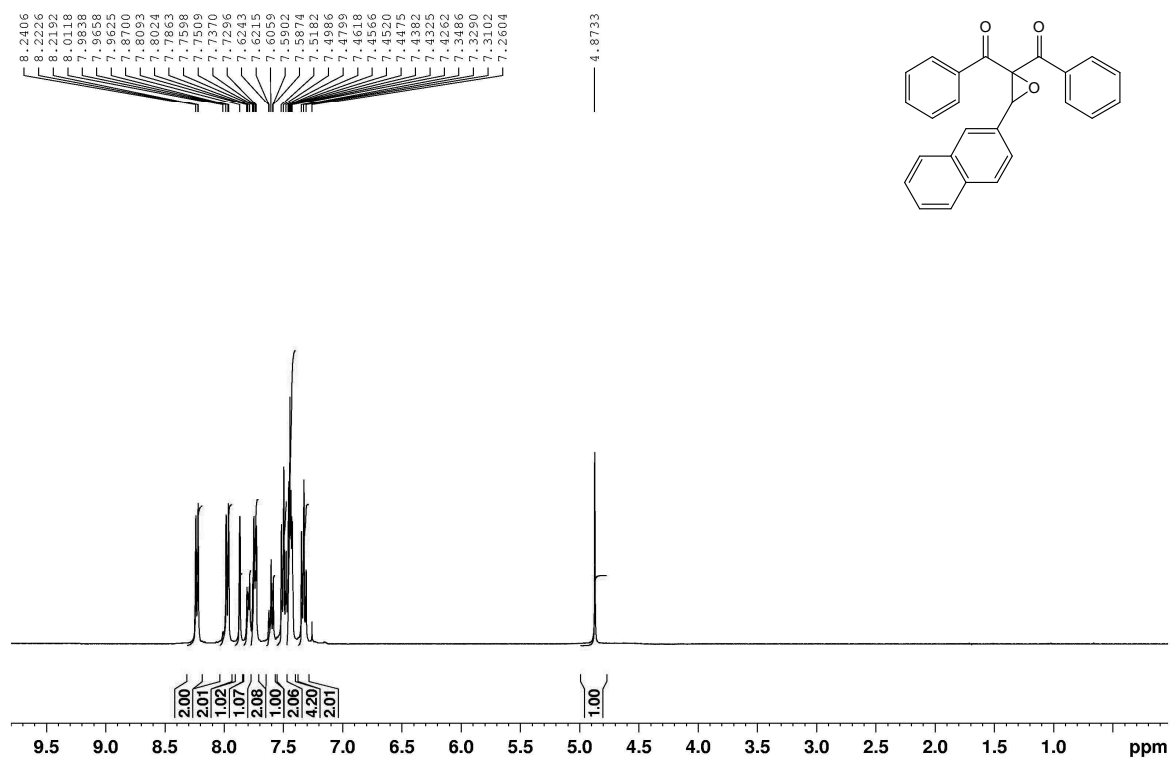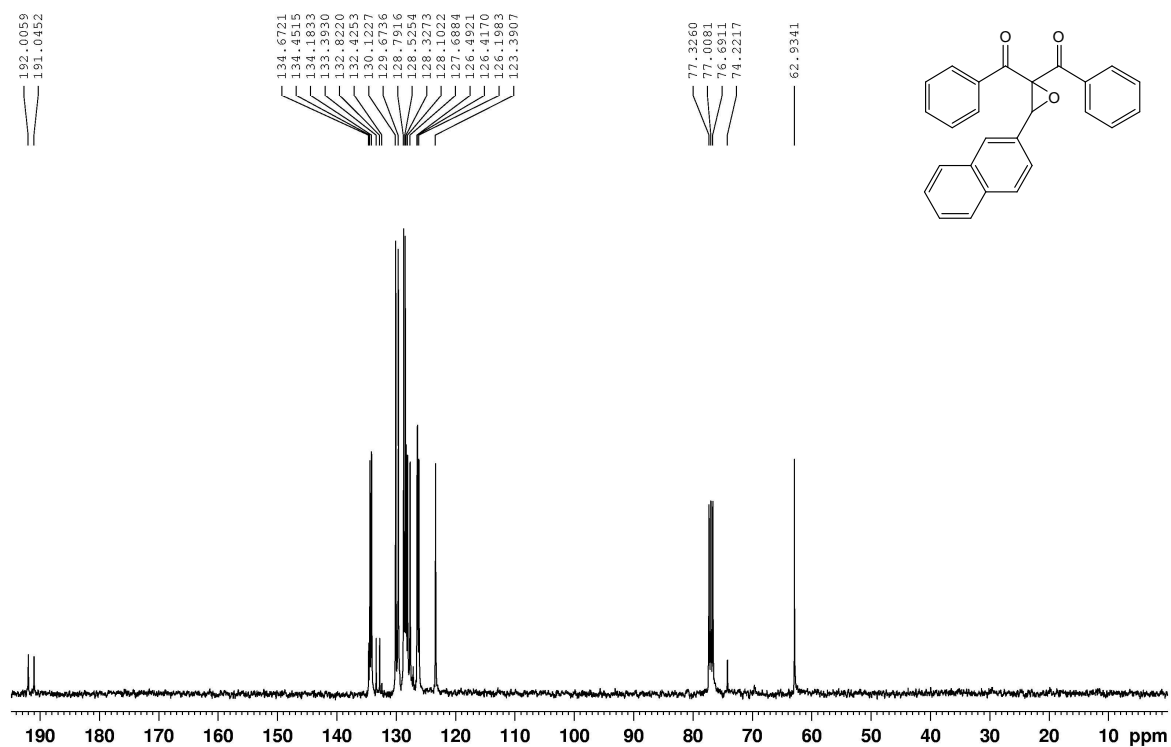

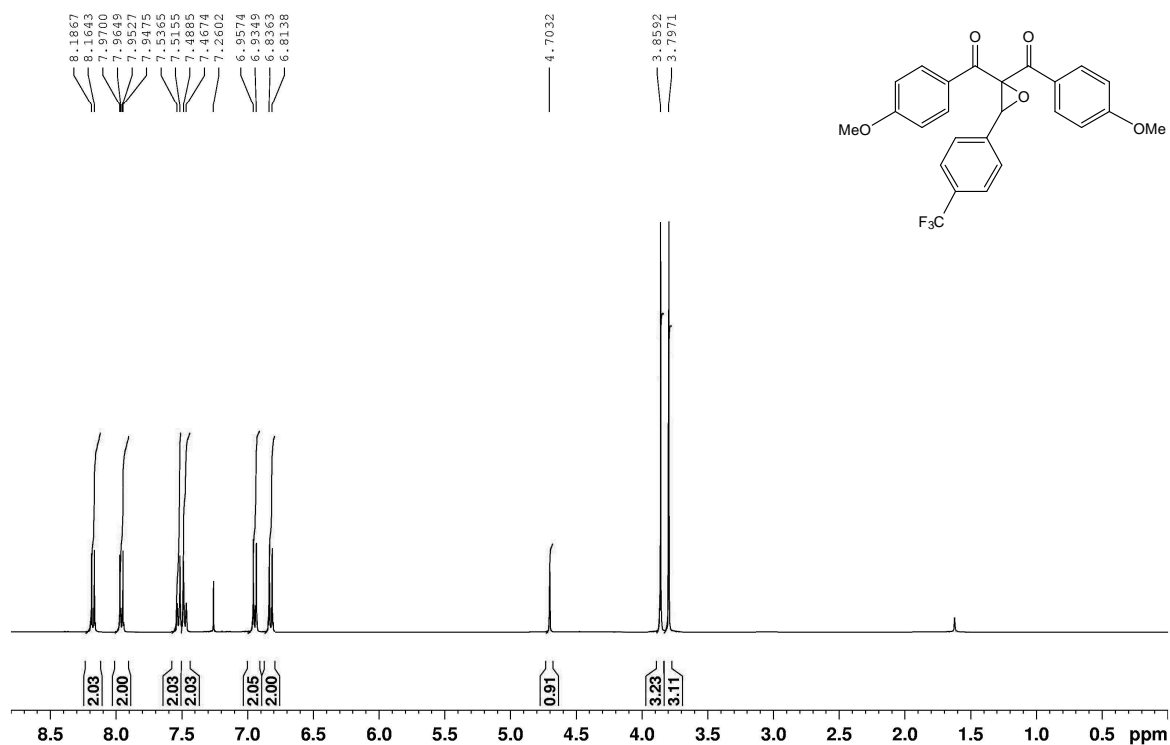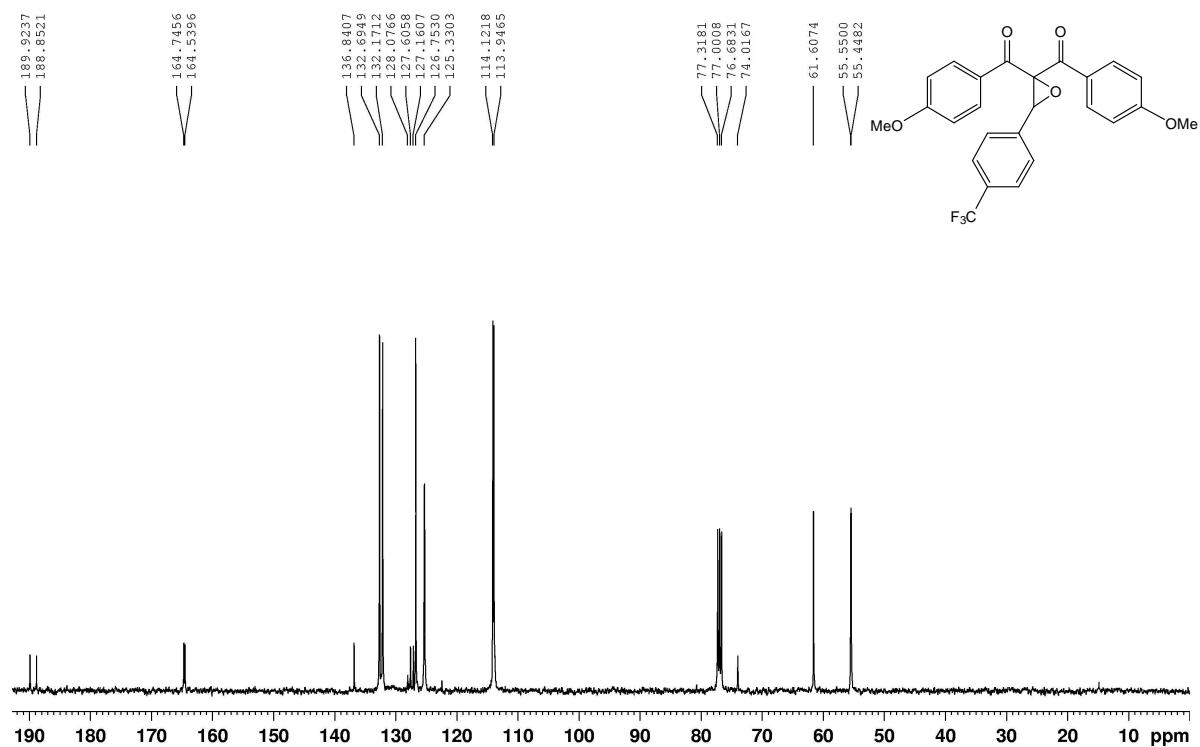

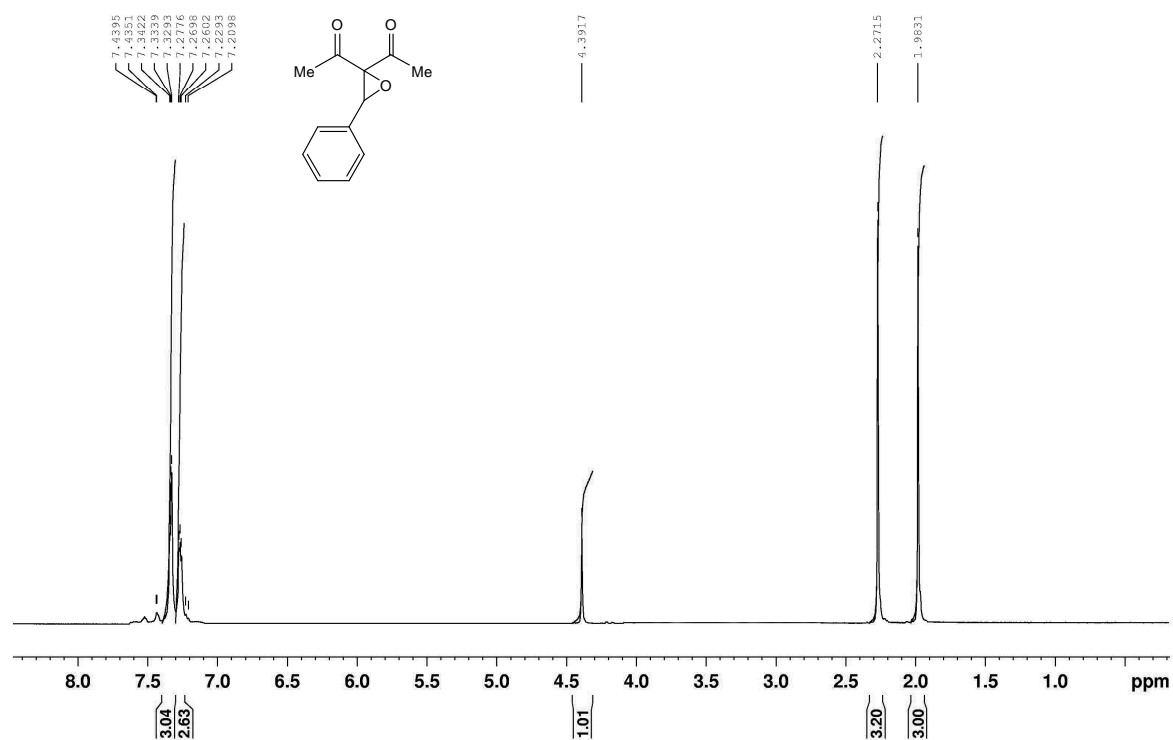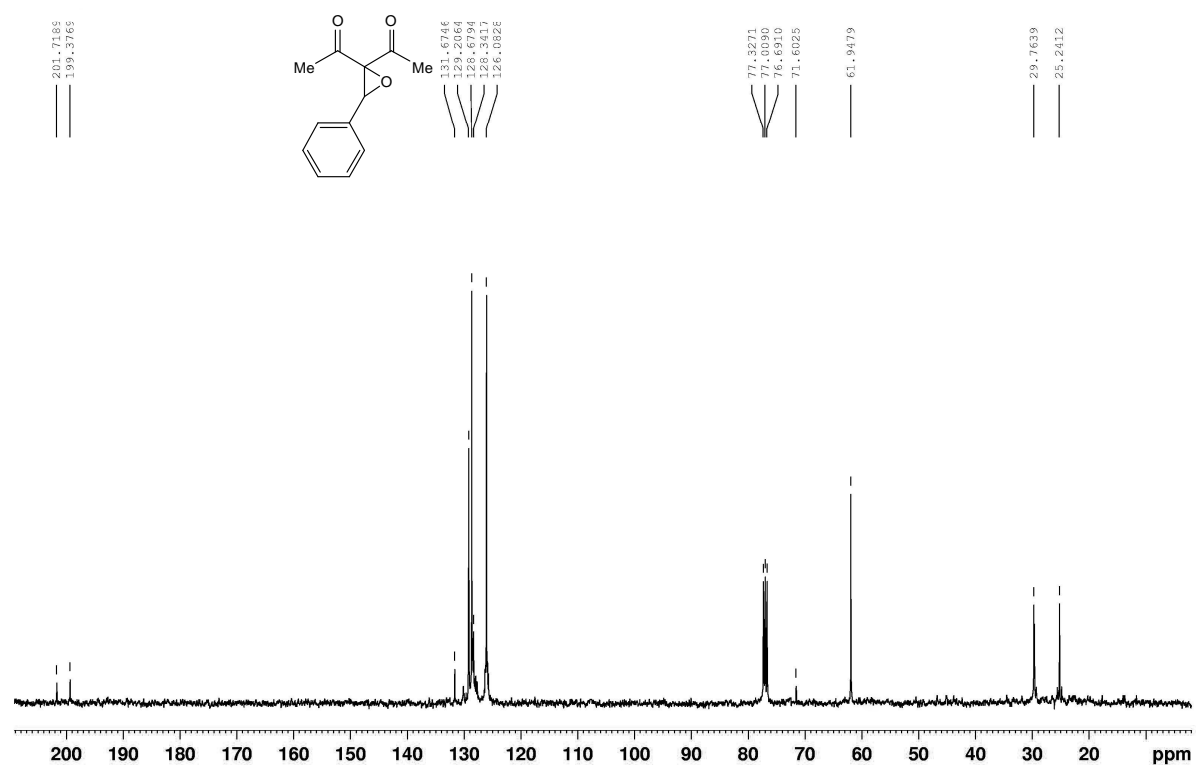

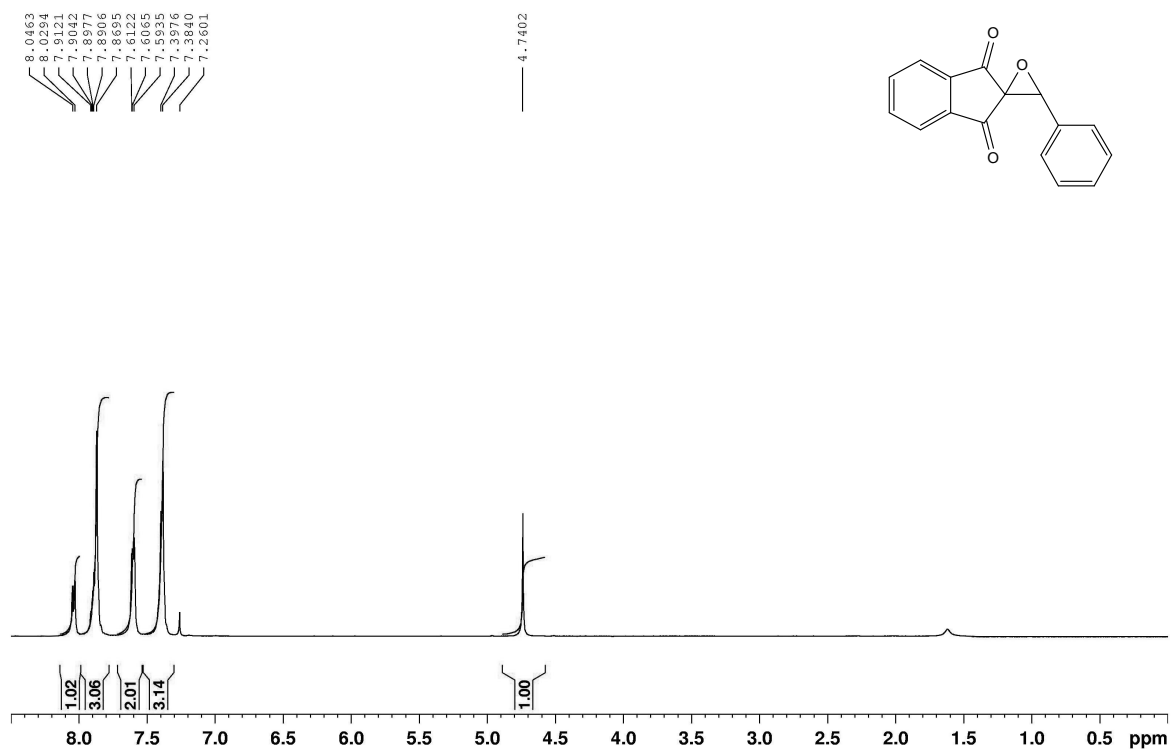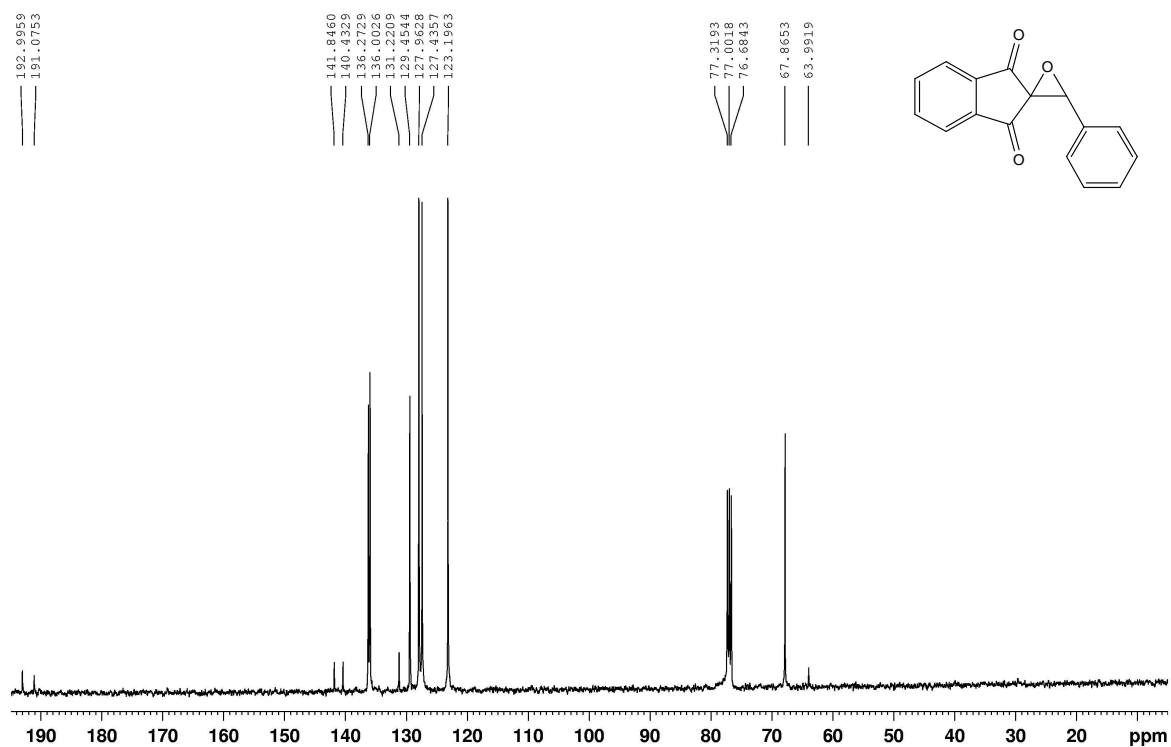

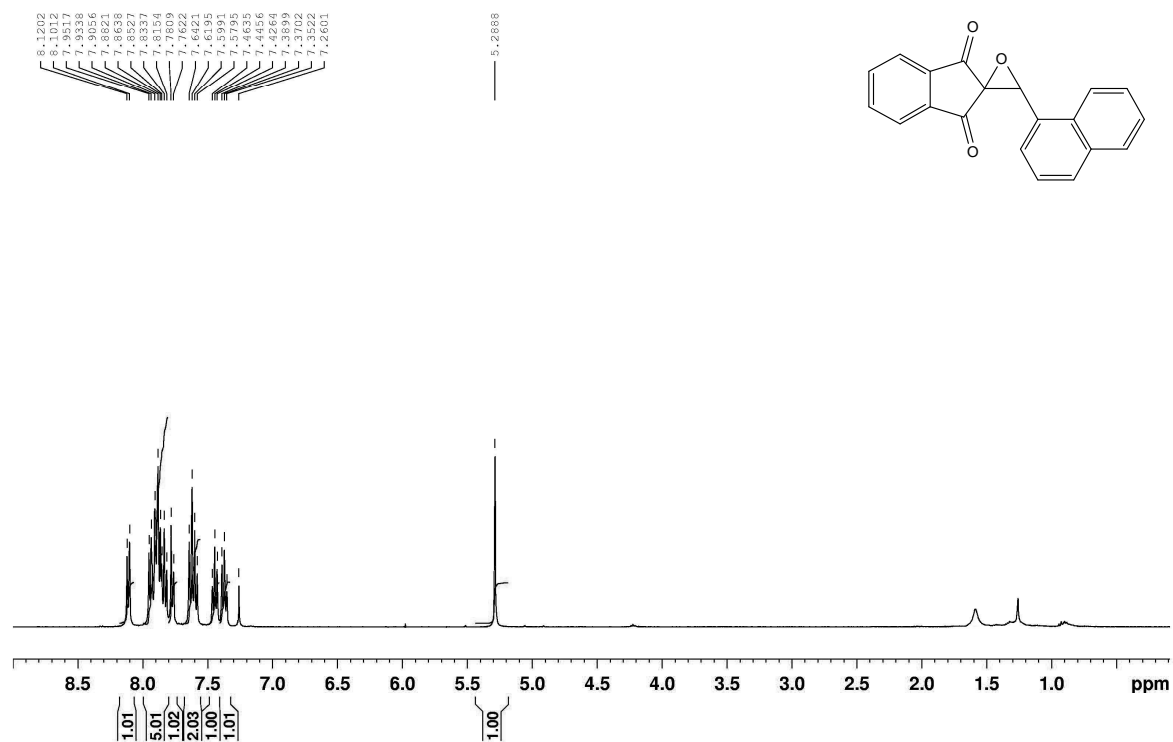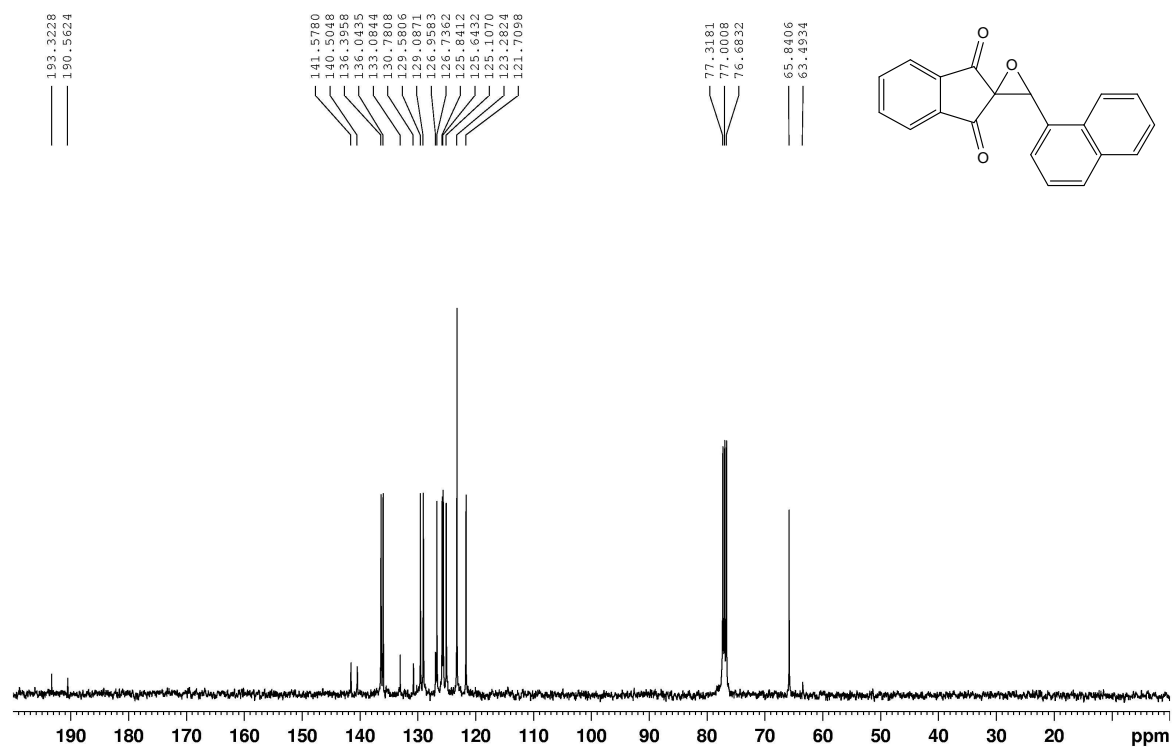

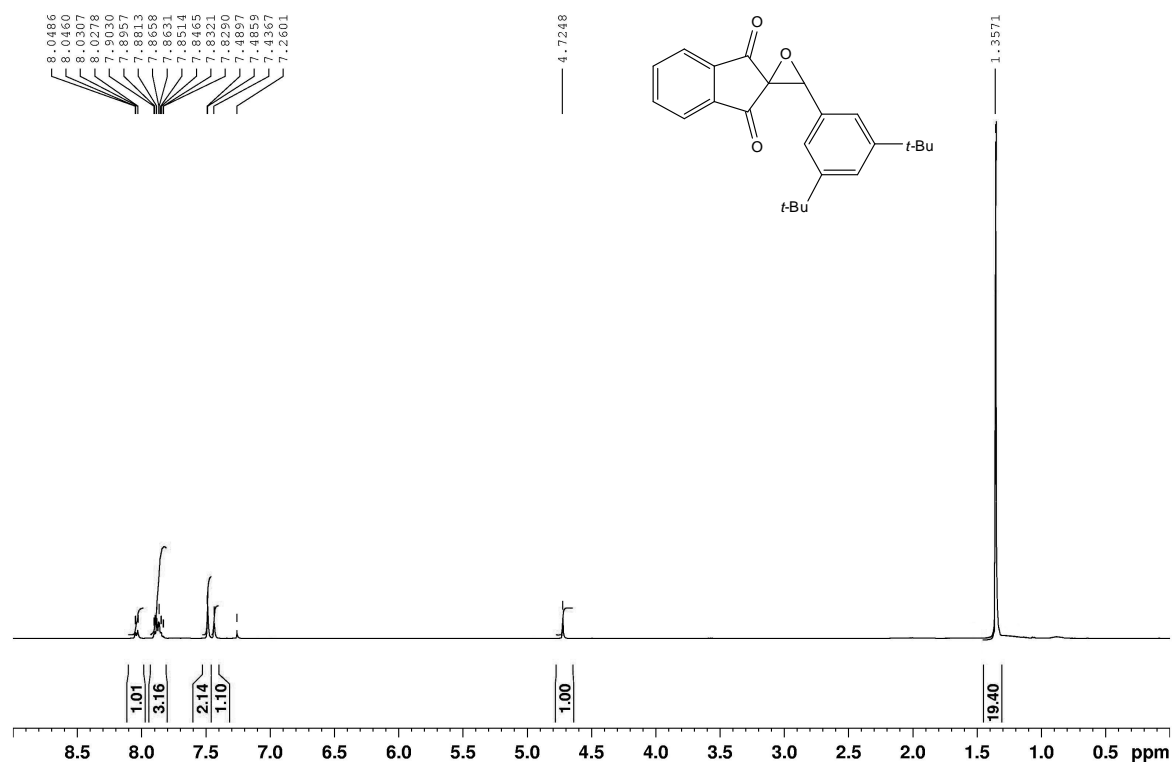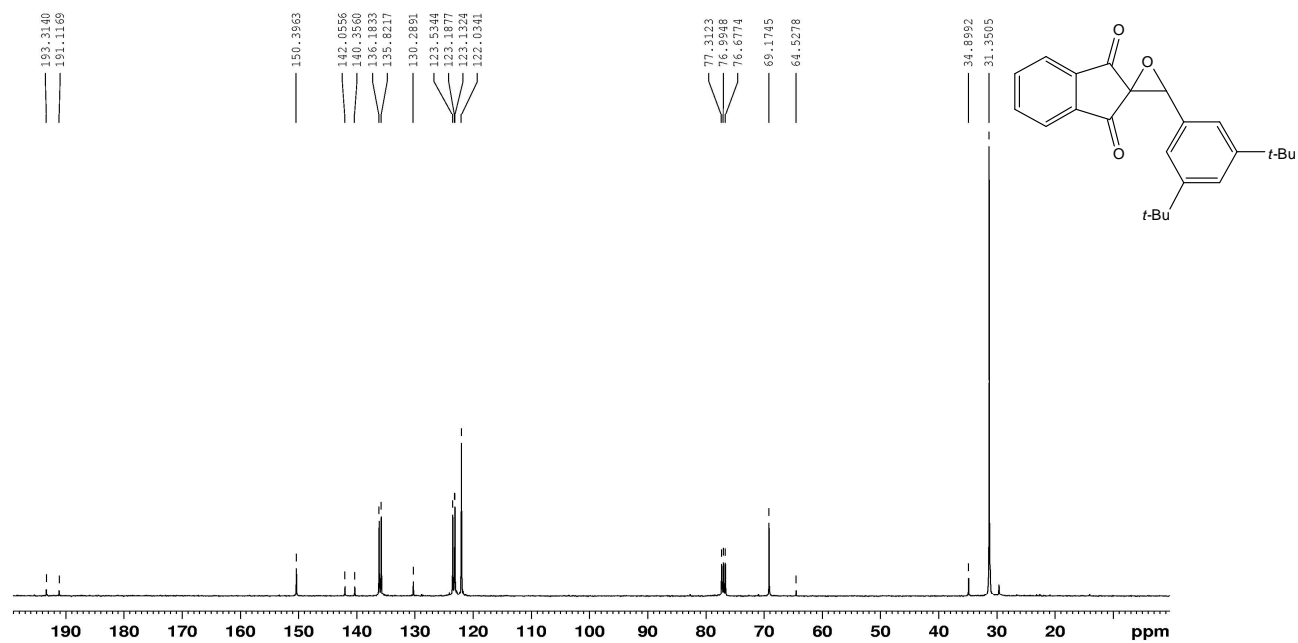

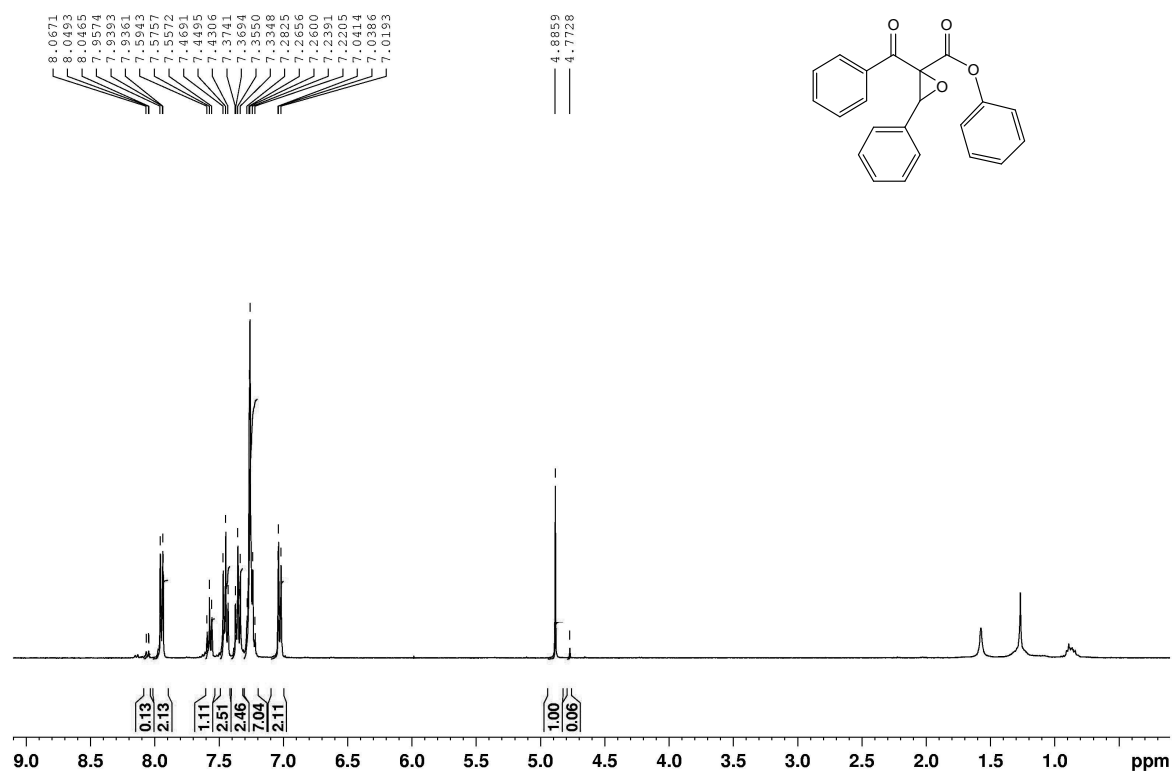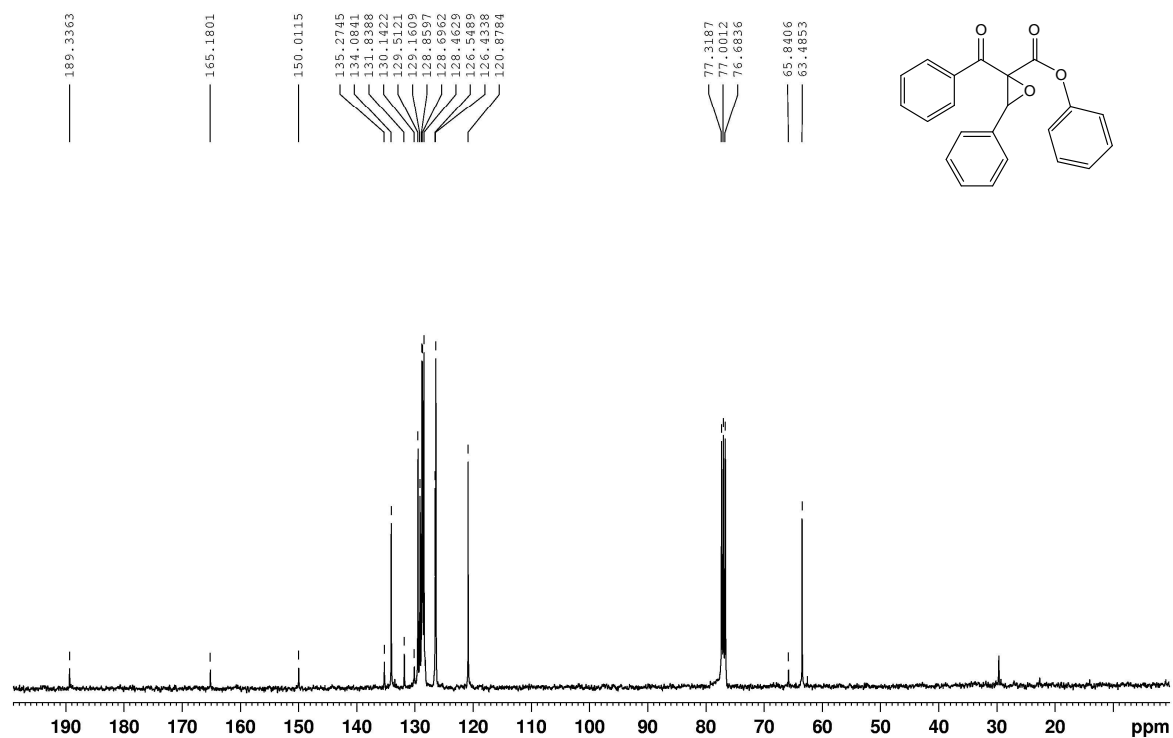

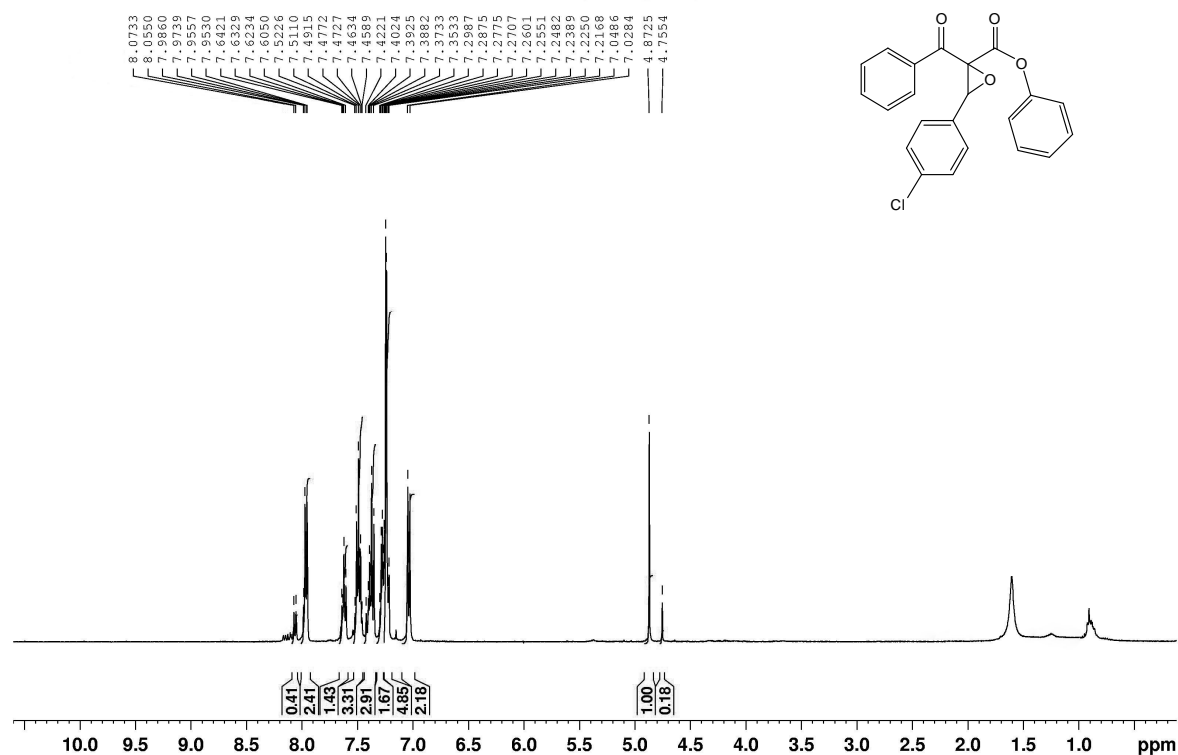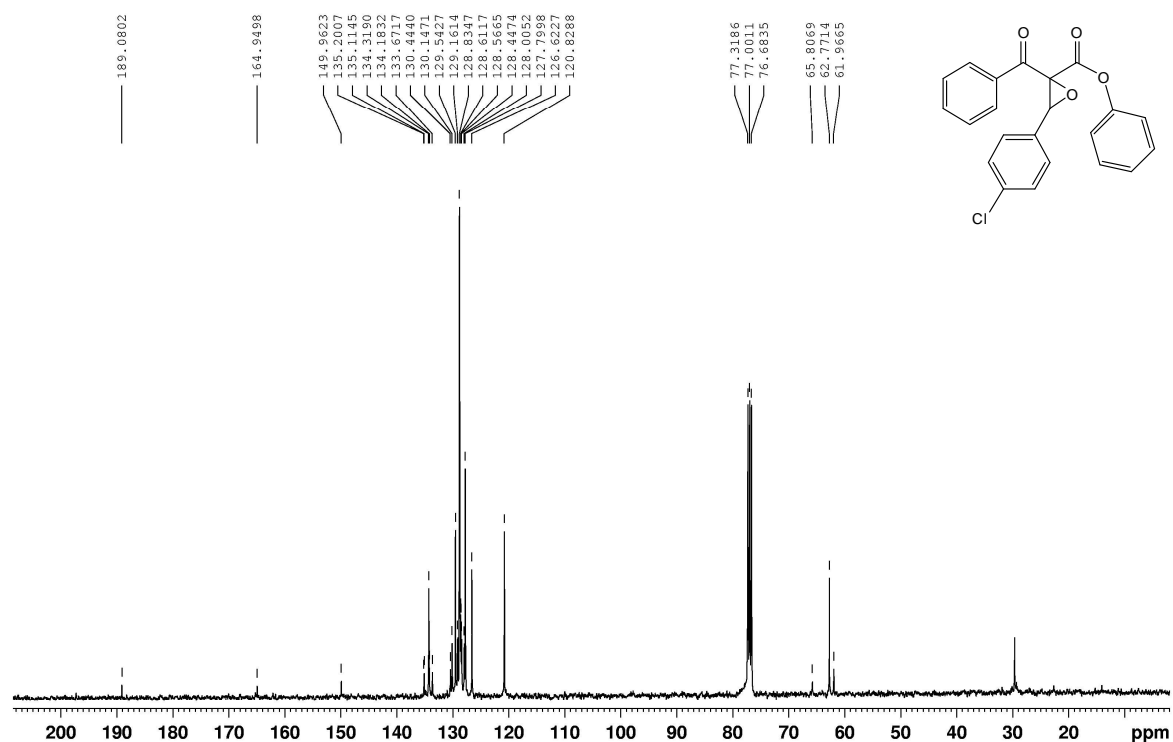



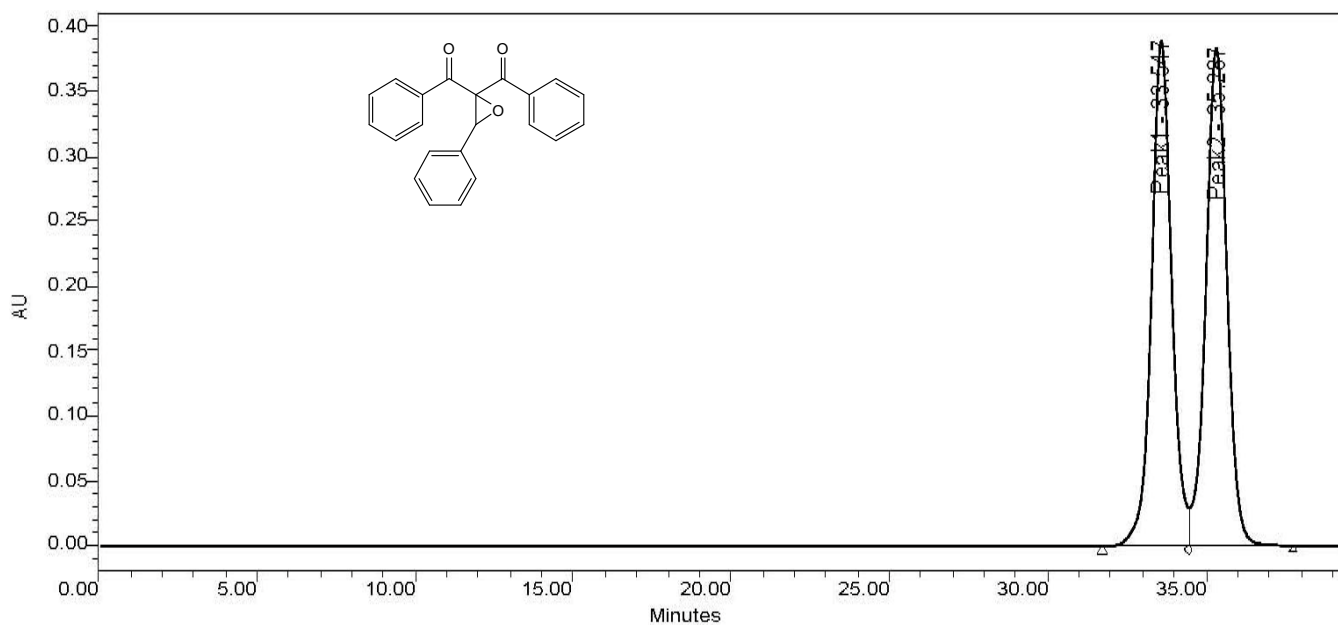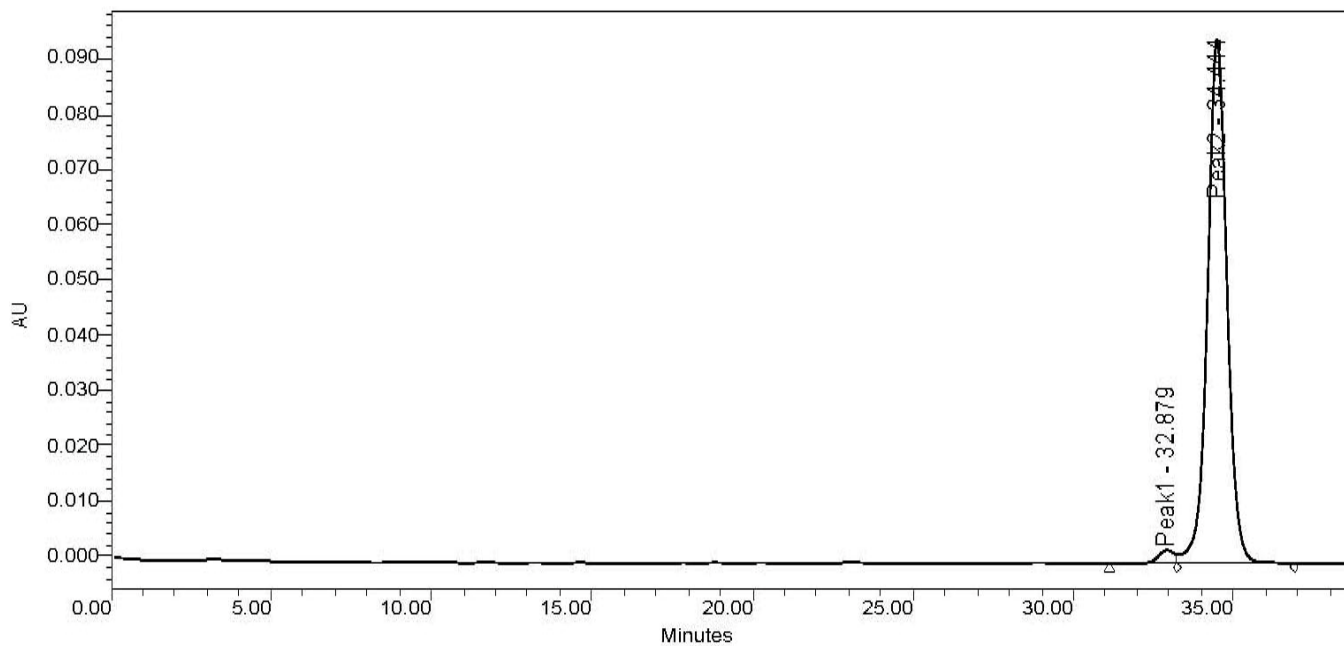

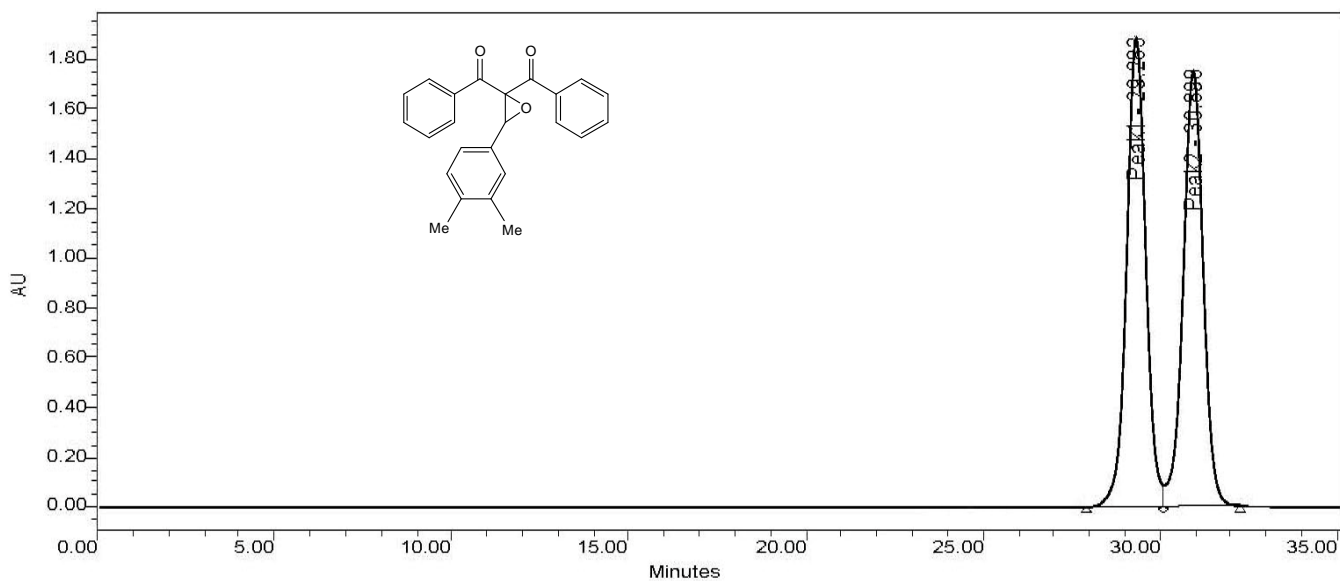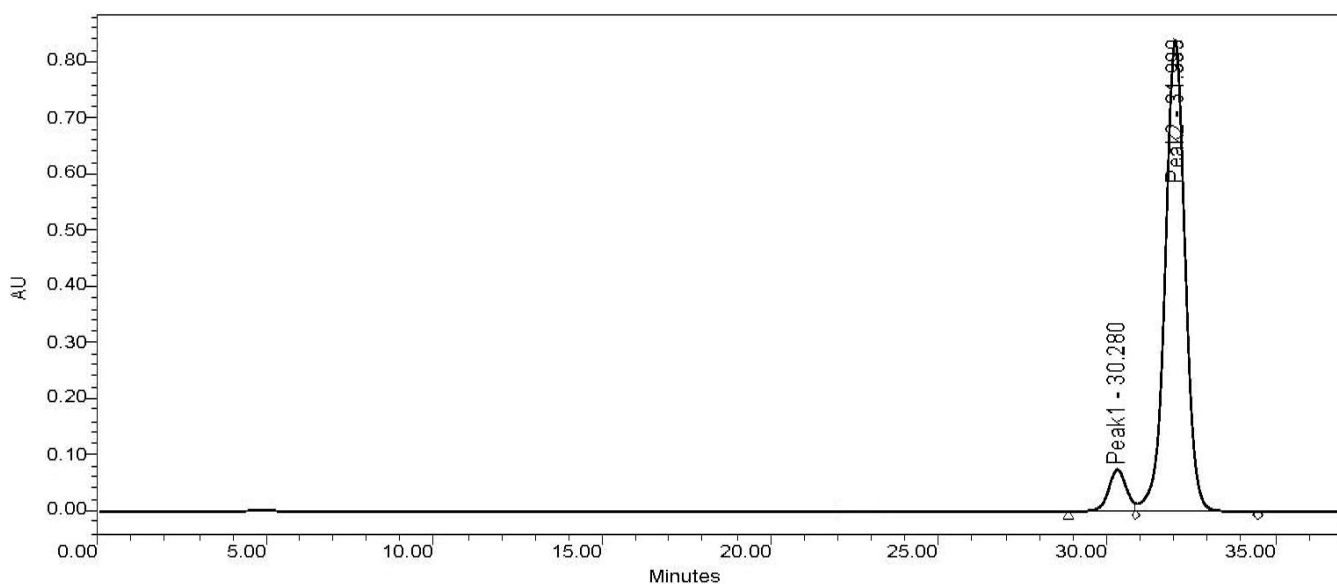

|   | Peak Name | RT (min) | Area (AU*sec) | % Area | Height (AU) | % Height |
|---|-----------|----------|---------------|--------|-------------|----------|
| 1 | Peak1     | 30.280   | 2890330       | 7.65   | 74952       | 8.19     |
| 2 | Peak2     | 31.999   | 34894935      | 92.35  | 840633      | 91.81    |

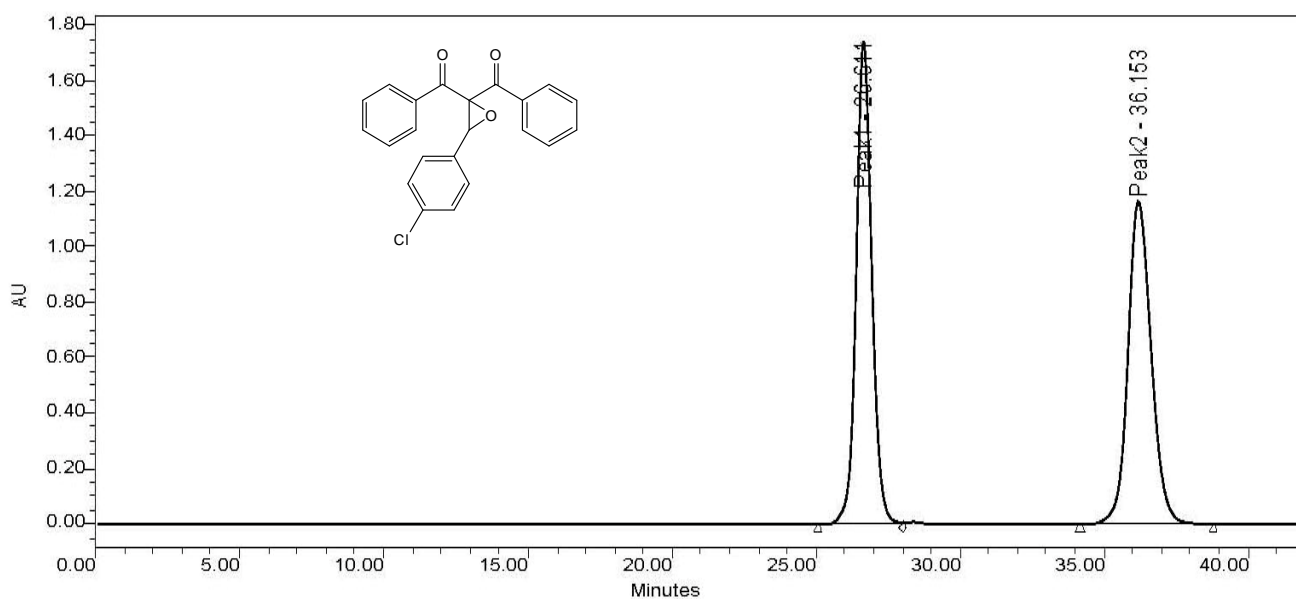

|   | Peak Name | RT (min) | Area (AU*sec) | % Area | Height (AU) | % Height |
|---|-----------|----------|---------------|--------|-------------|----------|
| 1 | Peak1     | 26.611   | 65834619      | 50.07  | 1743155     | 59.92    |
| 2 | Peak2     | 36.153   | 65643666      | 49.93  | 1165969     | 40.08    |

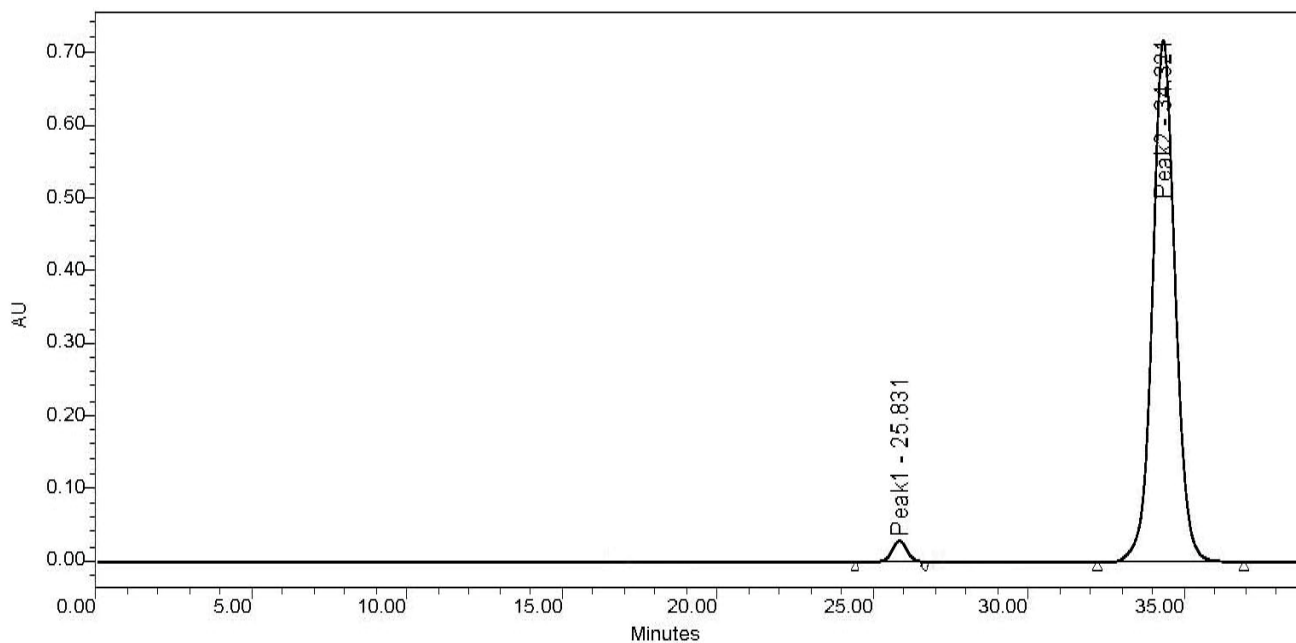

|   | Peak Name | RT (min) | Area (AU*sec) | % Area | Height (AU) | % Height |
|---|-----------|----------|---------------|--------|-------------|----------|
| 1 | Peak1     | 25.831   | 1060836       | 2.82   | 29795       | 3.99     |
| 2 | Peak2     | 34.321   | 36506333      | 97.18  | 717324      | 96.01    |

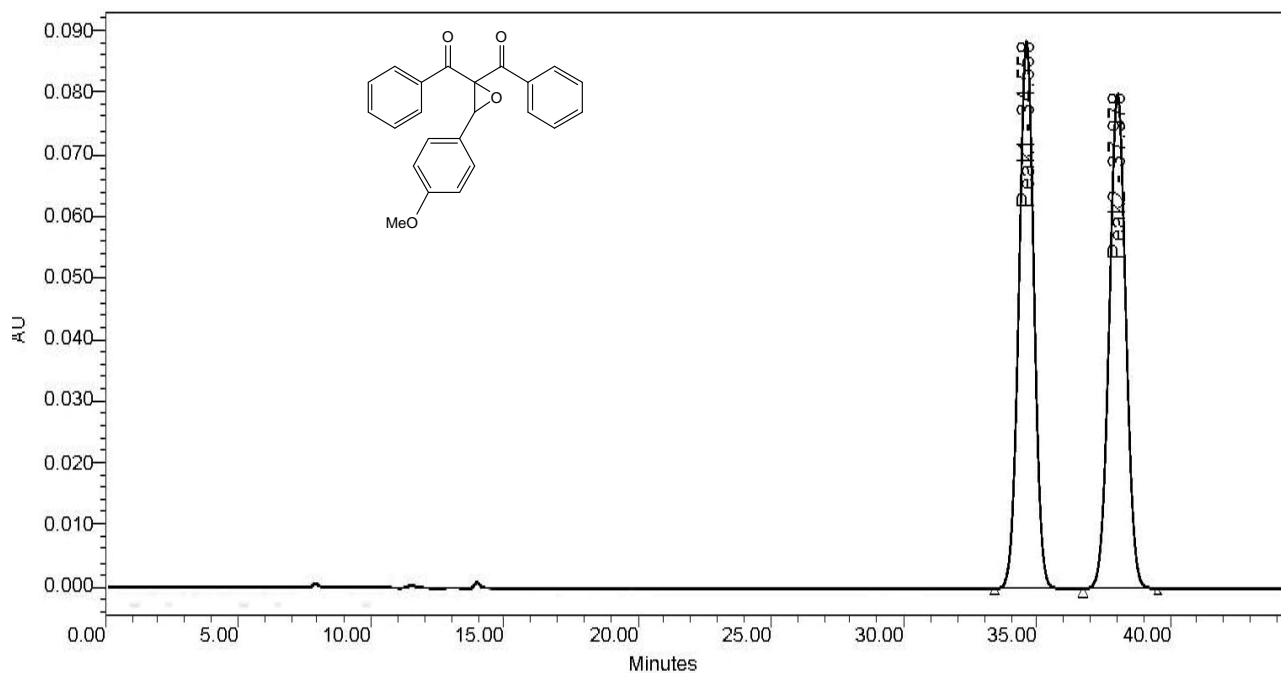

|   | Peak Name | RT (min) | Area (ΔV*sec) | % Area | Height (ΔV) | % Height |
|---|-----------|----------|---------------|--------|-------------|----------|
| 1 | Peak1     | 34.558   | 3498356       | 50.06  | 88521       | 52.50    |
| 2 | Peak2     | 37.978   | 3490260       | 49.94  | 80103       | 47.50    |

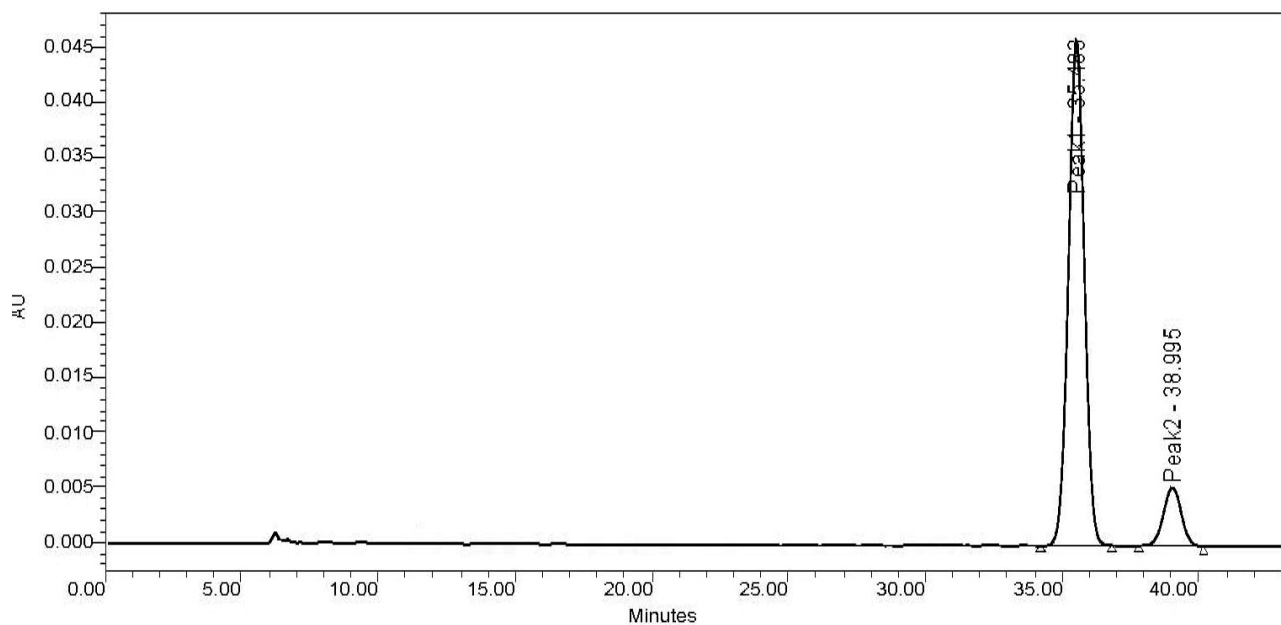

|   | Peak Name | RT (min) | Area (ΔV*sec) | % Area | Height (ΔV) | % Height |
|---|-----------|----------|---------------|--------|-------------|----------|
| 1 | Peak1     | 35.483   | 1861048       | 88.54  | 45903       | 89.62    |
| 2 | Peak2     | 38.995   | 240843        | 11.46  | 5318        | 10.38    |

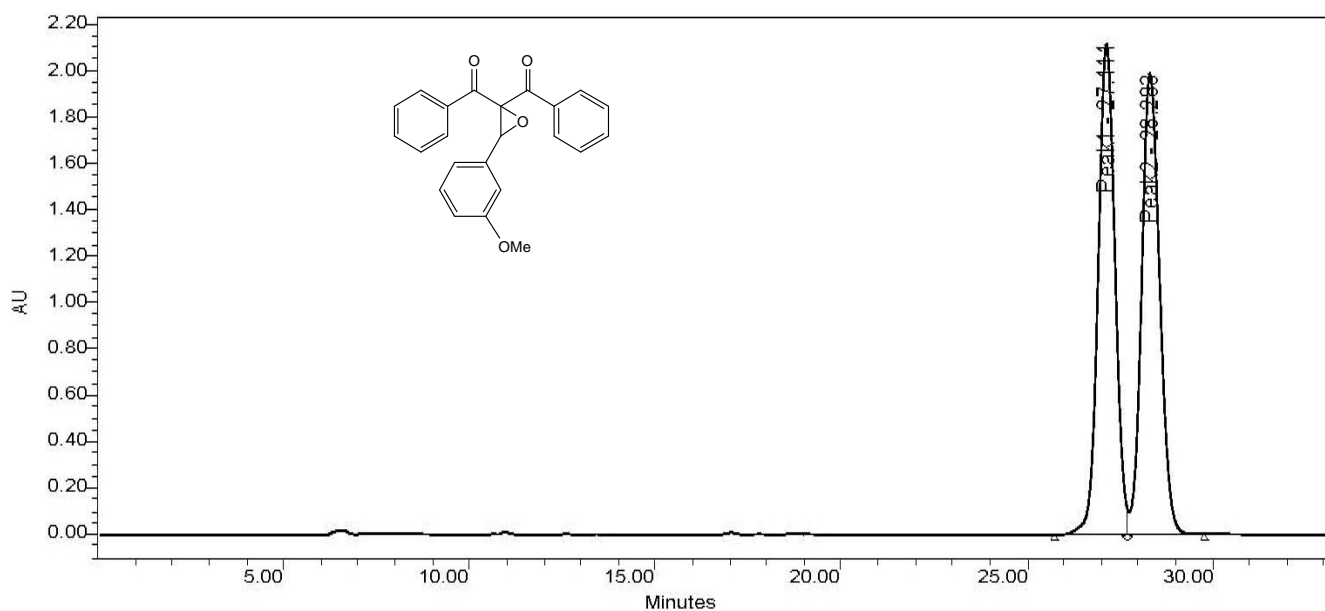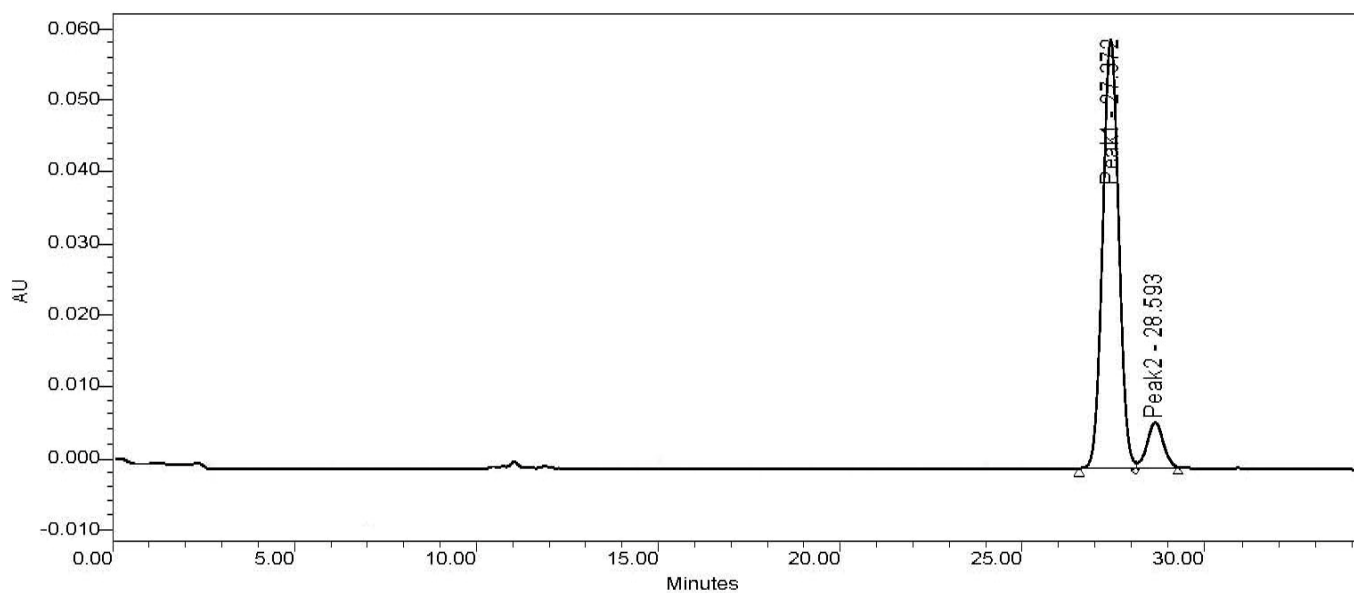

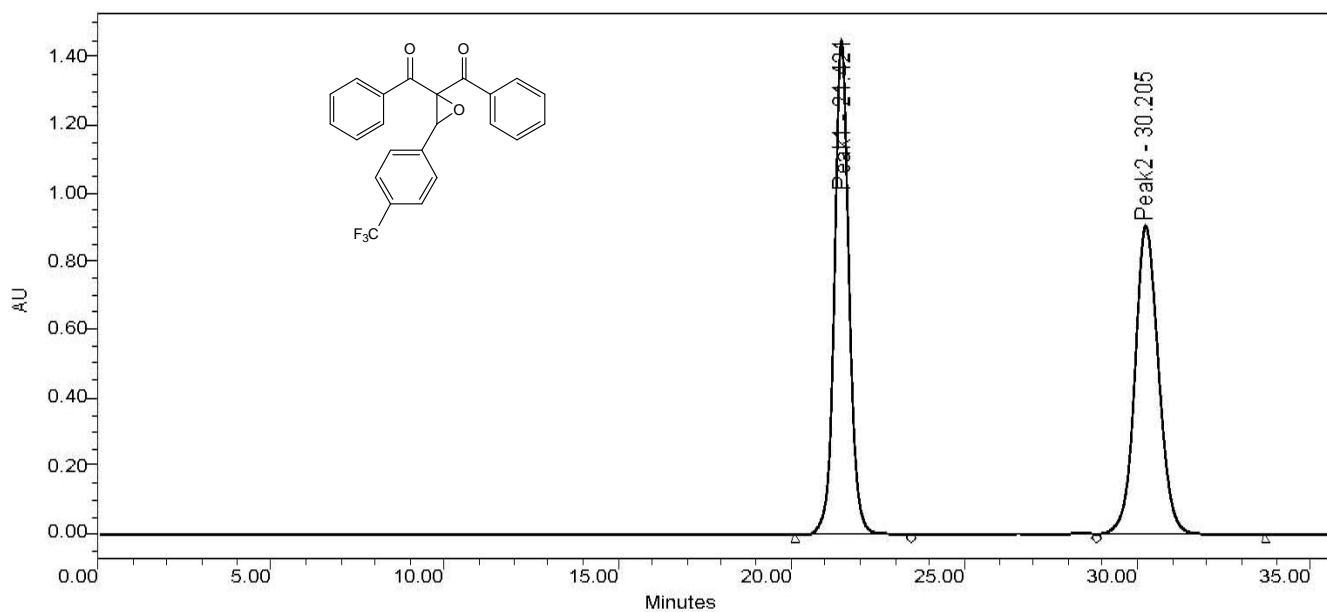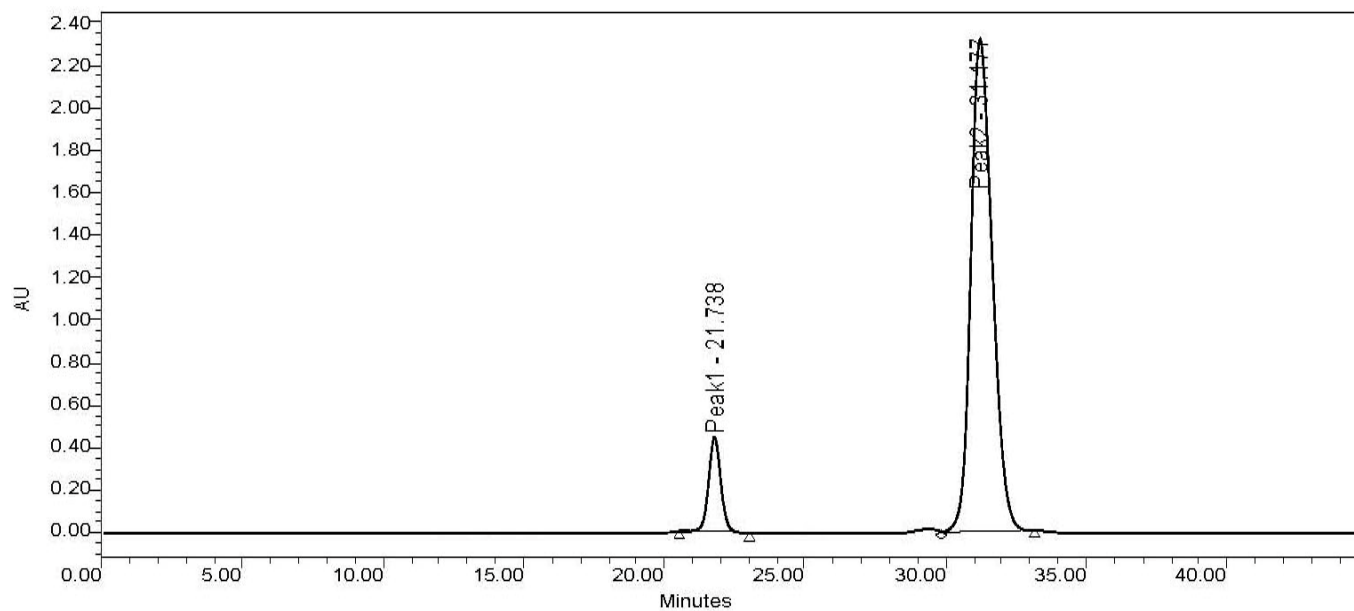

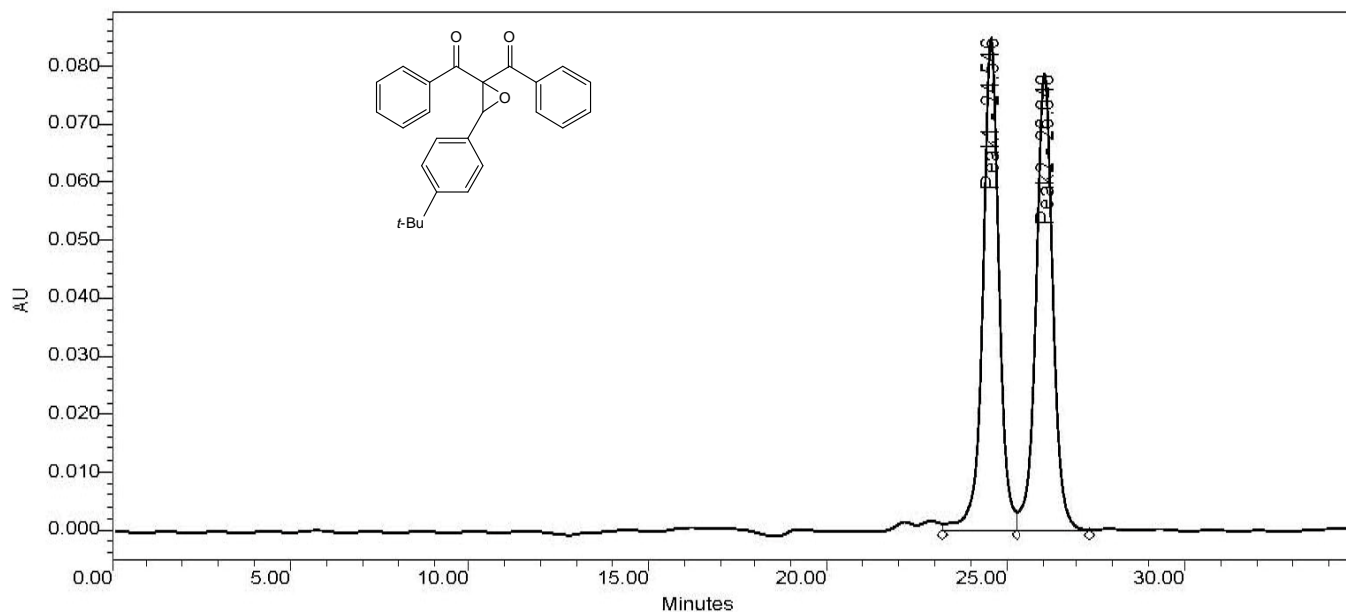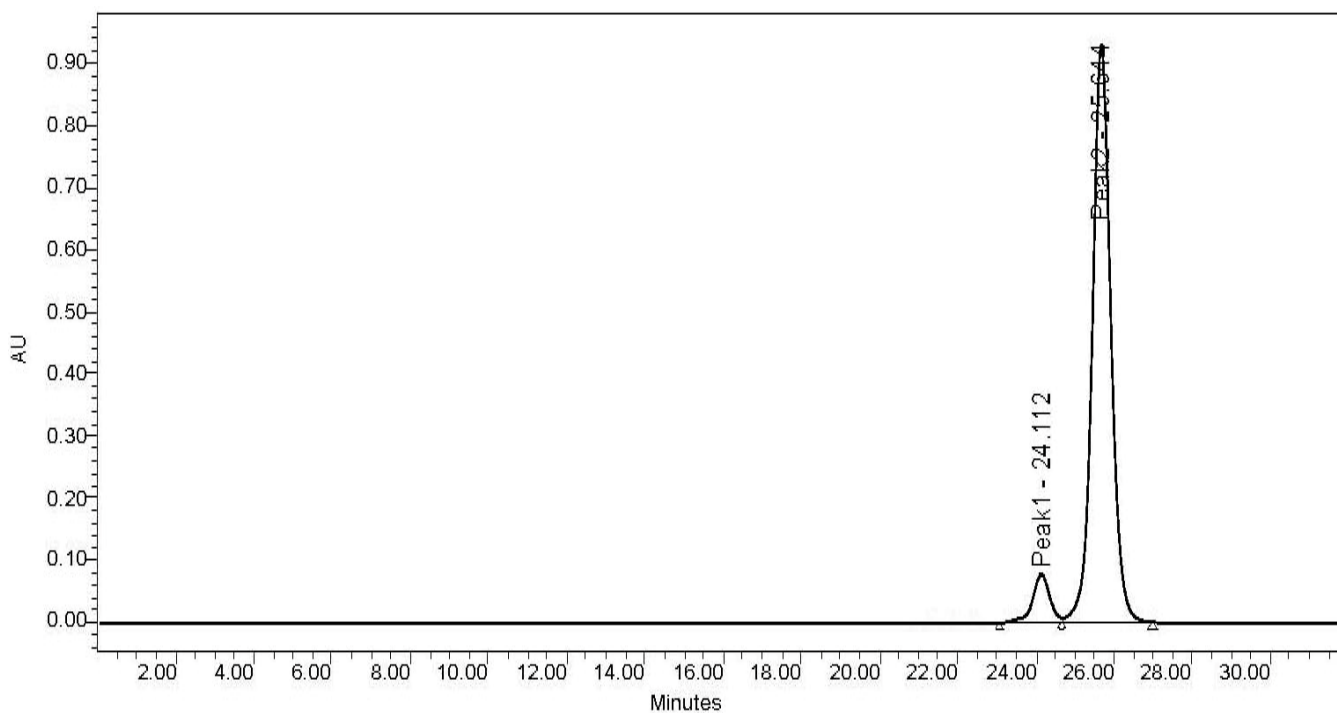

|   | Peak Name | RT (min) | Area (AU*sec) | % Area | Height (AU) | % Height |
|---|-----------|----------|---------------|--------|-------------|----------|
| 1 | Peak1     | 24.112   | 2434087       | 7.38   | 78170       | 7.75     |
| 2 | Peak2     | 25.644   | 30561074      | 92.62  | 930147      | 92.25    |

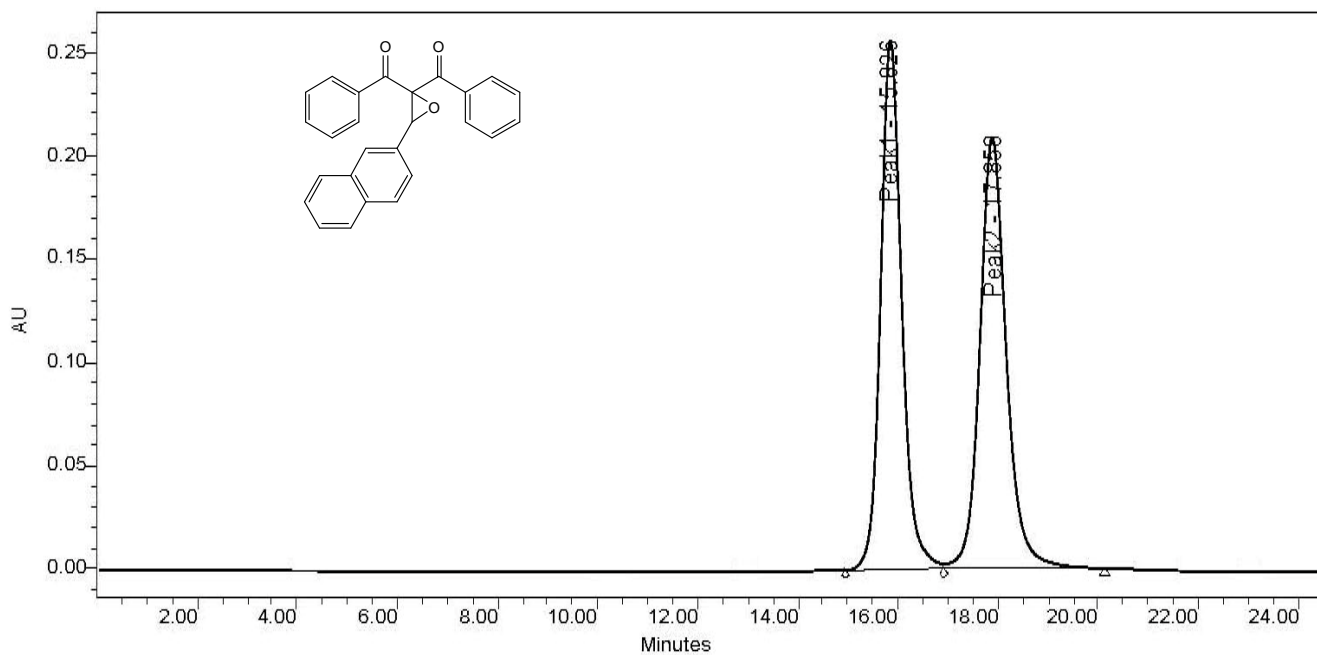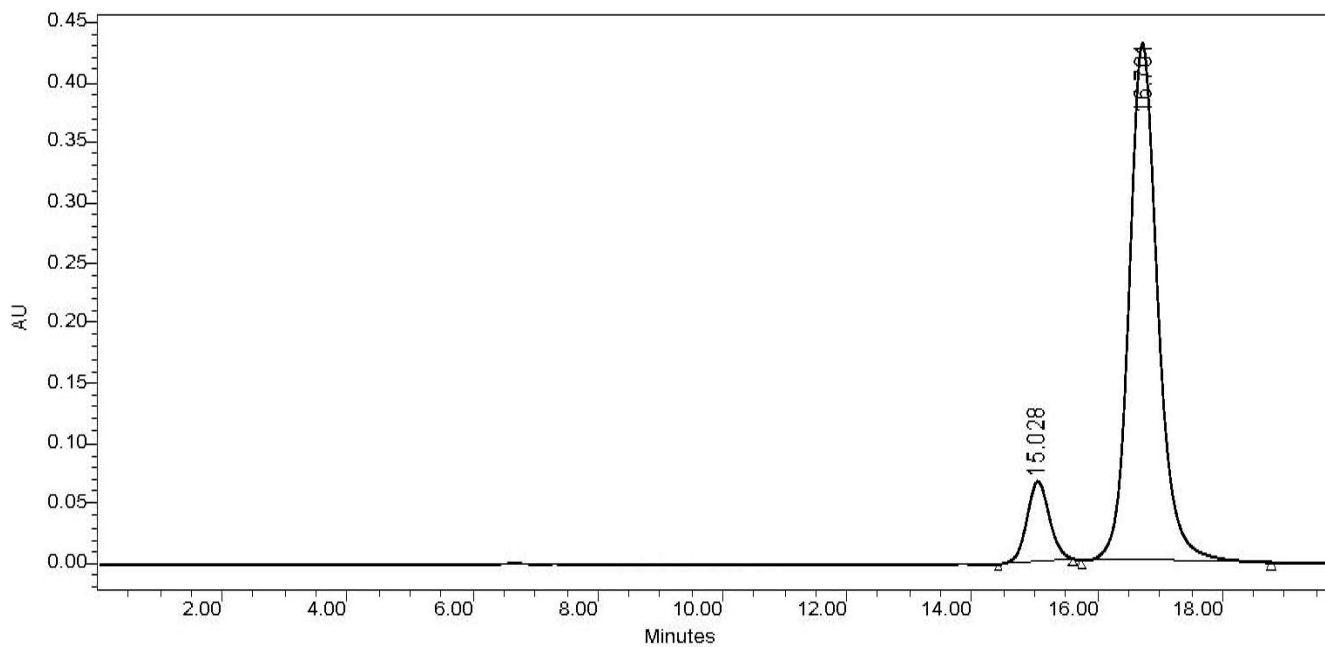

|   | RT (min) | Area (AU*sec) | % Area | Height (AU) | % Height |
|---|----------|---------------|--------|-------------|----------|
| 1 | 15.028   | 1667917       | 10.79  | 66647       | 13.41    |
| 2 | 16.701   | 13796165      | 89.21  | 430373      | 86.59    |



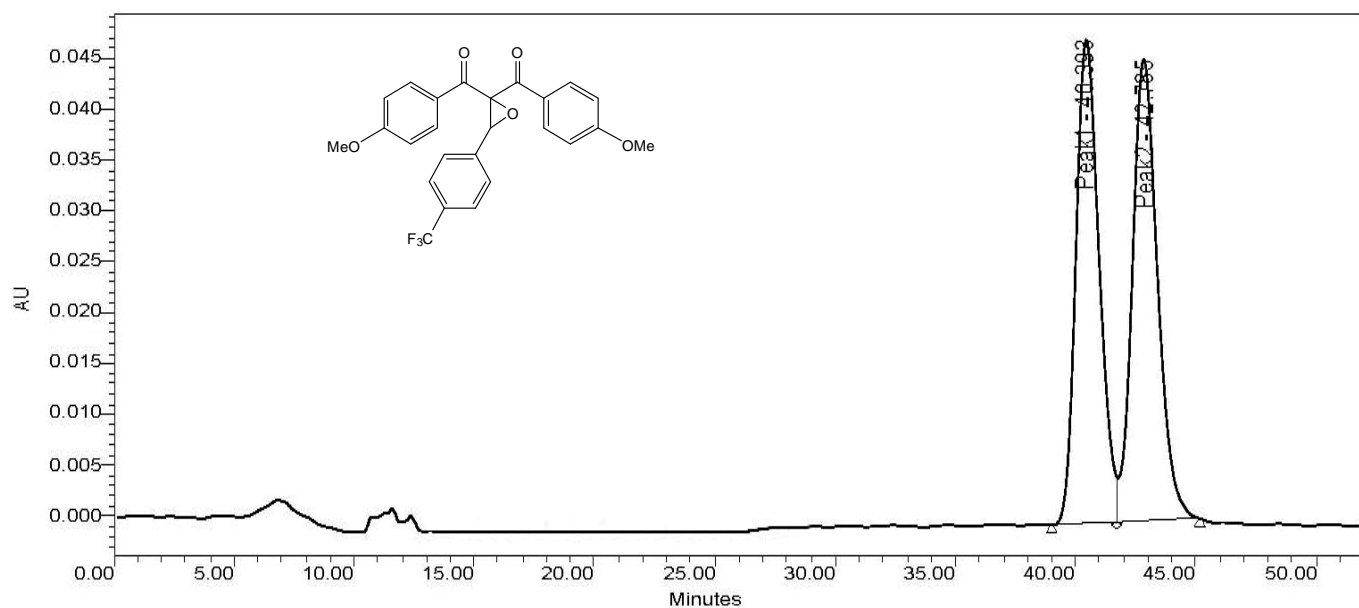

|   | Peak Name | RT (min) | Area (ΔV*sec) | % Area | Height (ΔV) | % Height |
|---|-----------|----------|---------------|--------|-------------|----------|
| 1 | Peak1     | 40.393   | 3204519       | 49.23  | 47491       | 51.14    |
| 2 | Peak2     | 42.785   | 3304803       | 50.77  | 45375       | 48.86    |

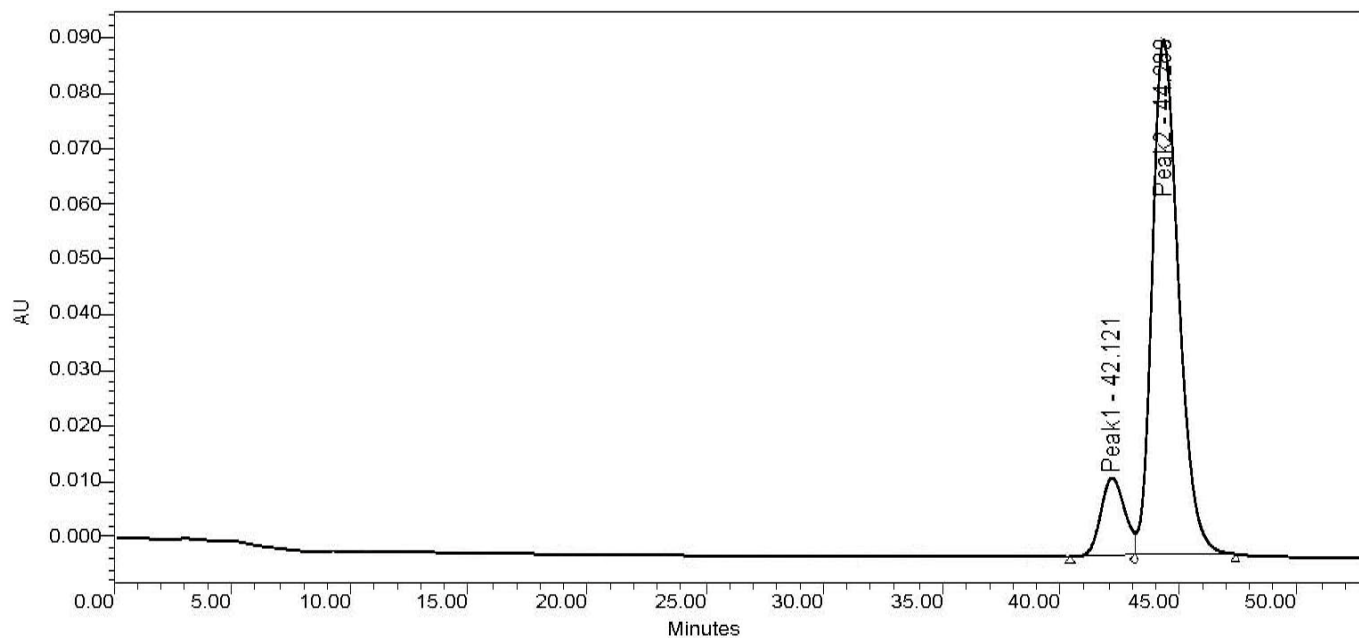

|   | Peak Name | RT (min) | Area (ΔV*sec) | % Area | Height (ΔV) | % Height |
|---|-----------|----------|---------------|--------|-------------|----------|
| 1 | Peak1     | 42.121   | 996788        | 12.17  | 14163       | 13.22    |
| 2 | Peak2     | 44.289   | 7196304       | 87.83  | 92963       | 86.78    |

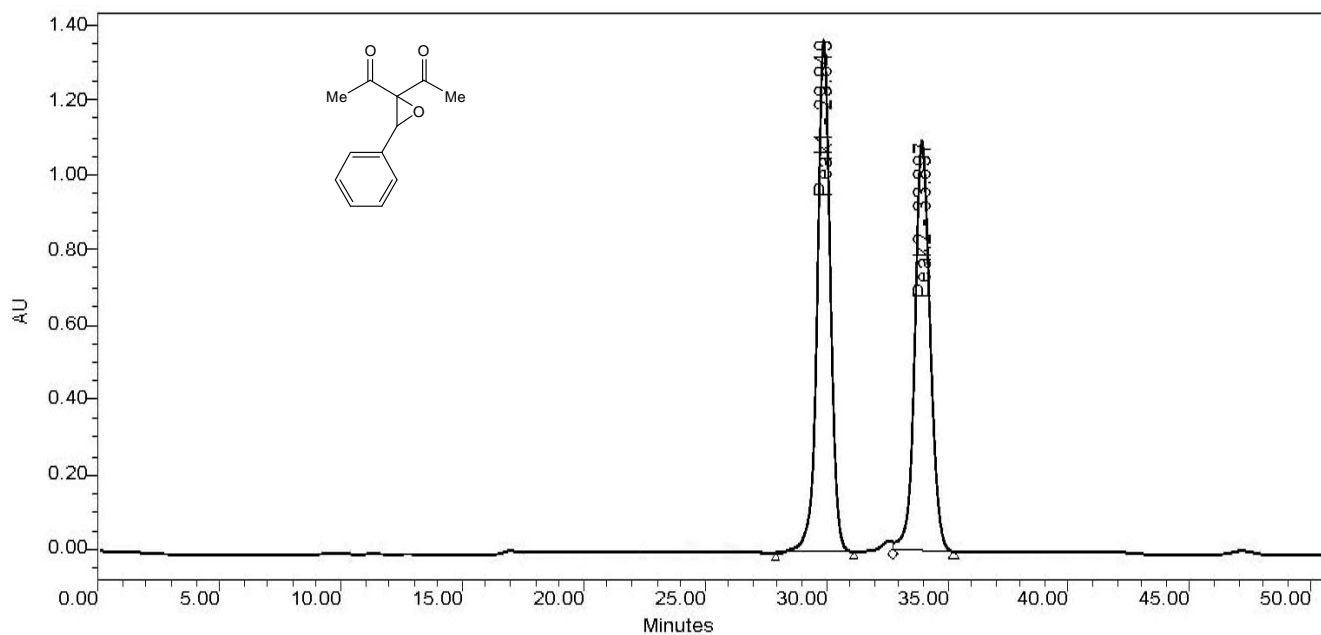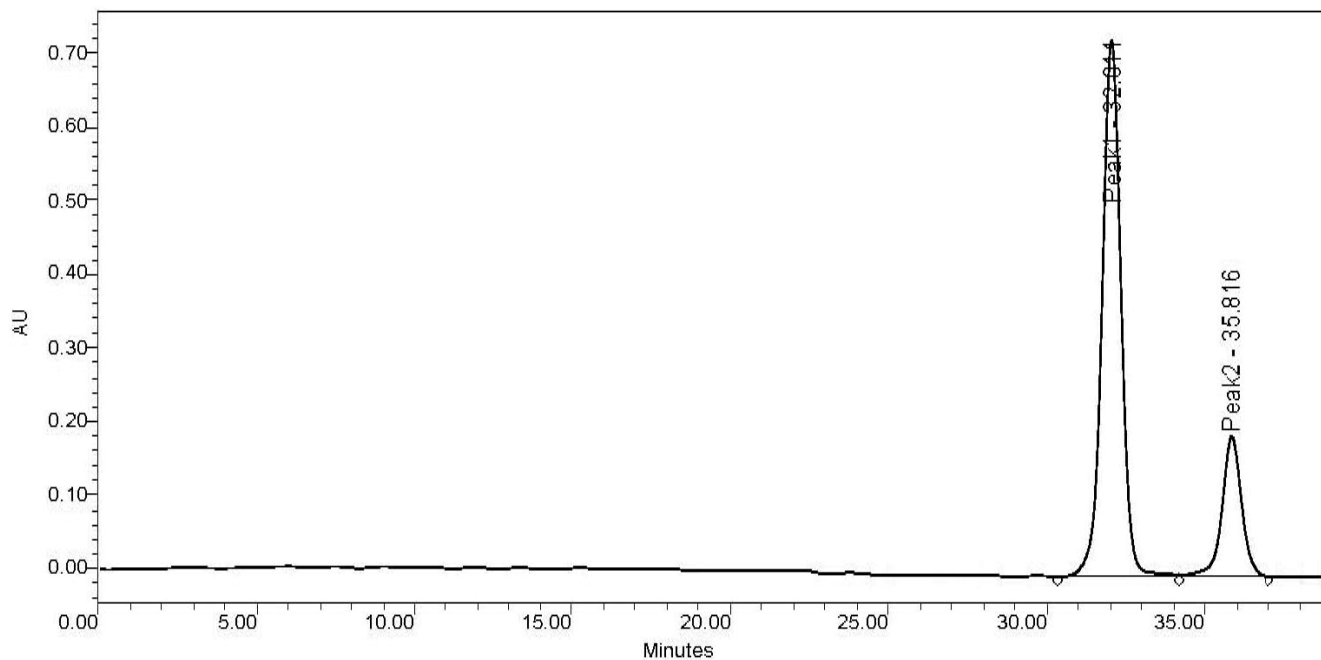

|   | Peak Name | RT (min) | Area (ΔV*sec) | % Area | Height (ΔV) | % Height |
|---|-----------|----------|---------------|--------|-------------|----------|
| 1 | Peak1     | 32.011   | 30479002      | 78.42  | 729661      | 79.25    |
| 2 | Peak2     | 35.816   | 8385086       | 21.58  | 191101      | 20.75    |

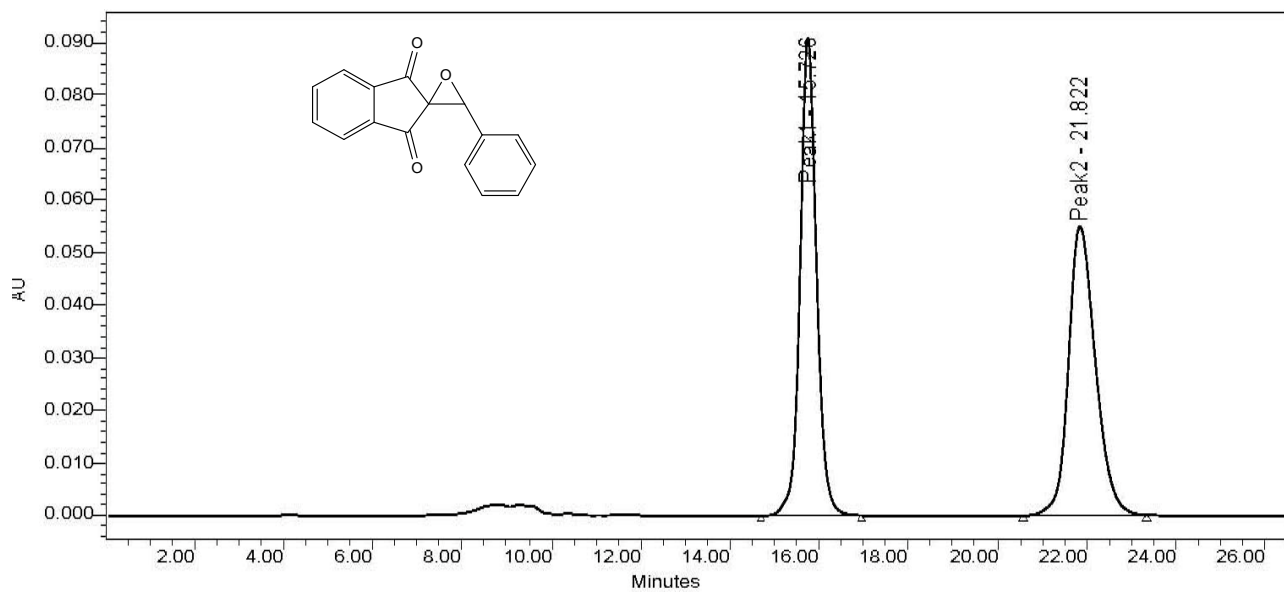

|   | Peak Name | RT (min) | Area (AU*sec) | % Area | Height (AU) | % Height |
|---|-----------|----------|---------------|--------|-------------|----------|
| 1 | Peak1     | 15.726   | 2325634       | 50.12  | 90904       | 62.30    |
| 2 | Peak2     | 21.822   | 2314689       | 49.88  | 55016       | 37.70    |

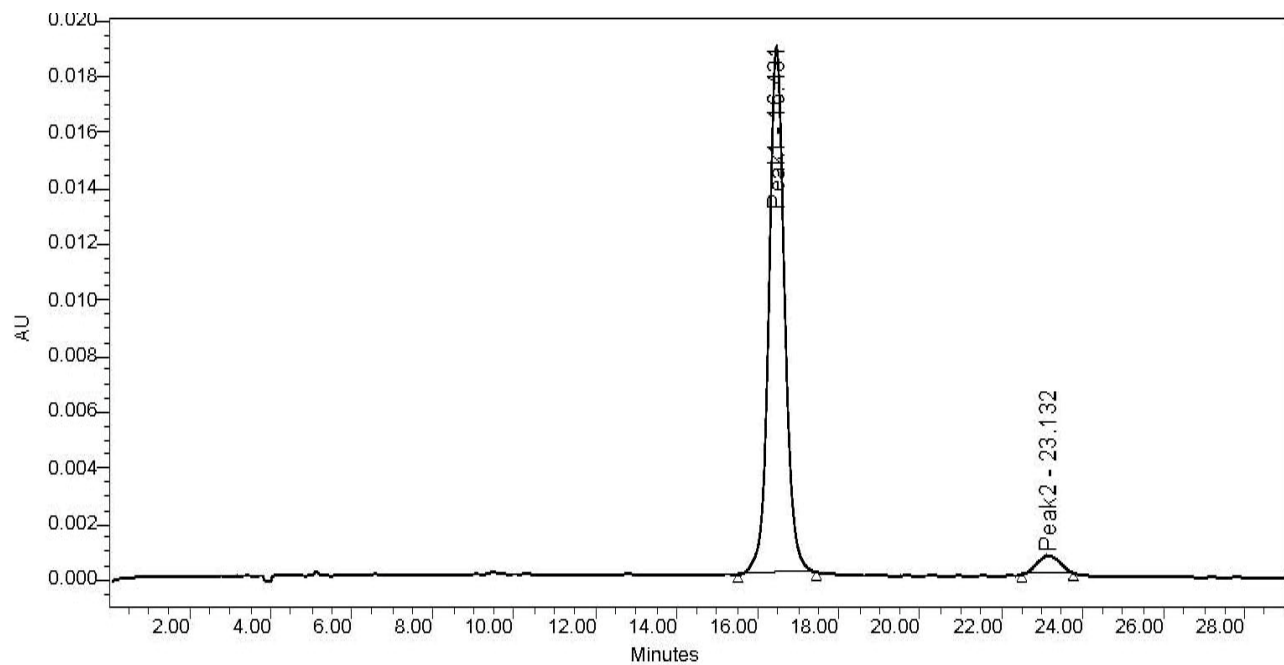

|   | Peak Name | RT (min) | Area (AU*sec) | % Area | Height (AU) | % Height |
|---|-----------|----------|---------------|--------|-------------|----------|
| 1 | Peak1     | 16.431   | 513576        | 95.27  | 18811       | 96.67    |
| 2 | Peak2     | 23.132   | 25481         | 4.73   | 647         | 3.33     |

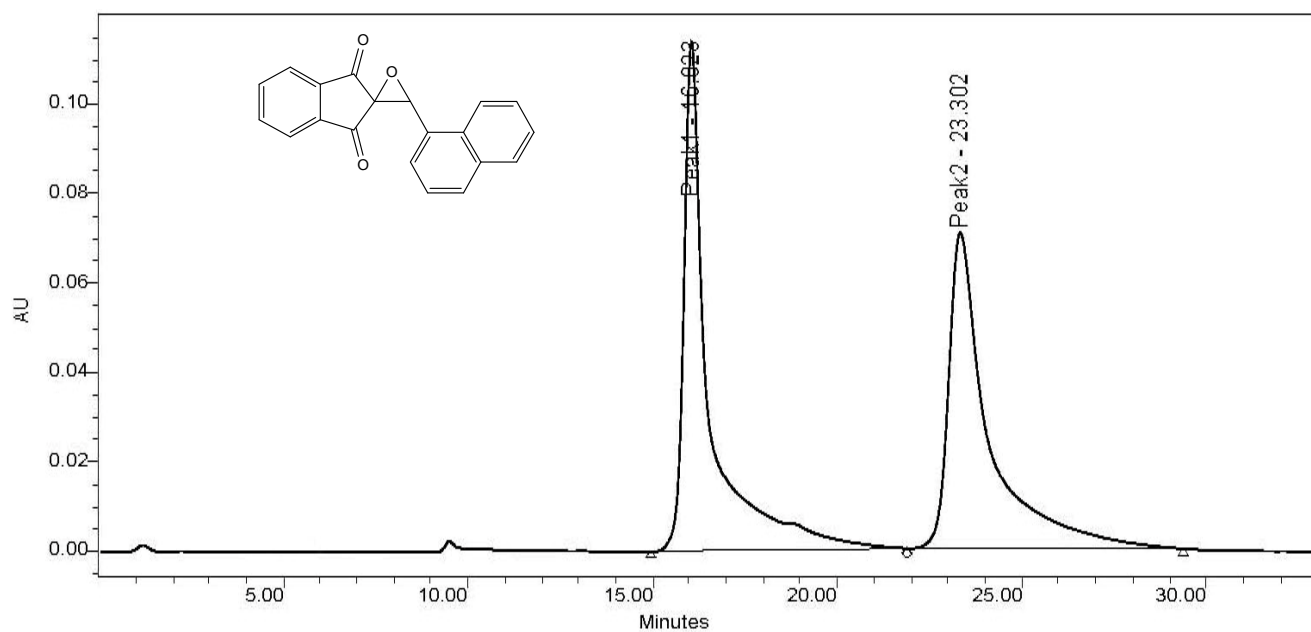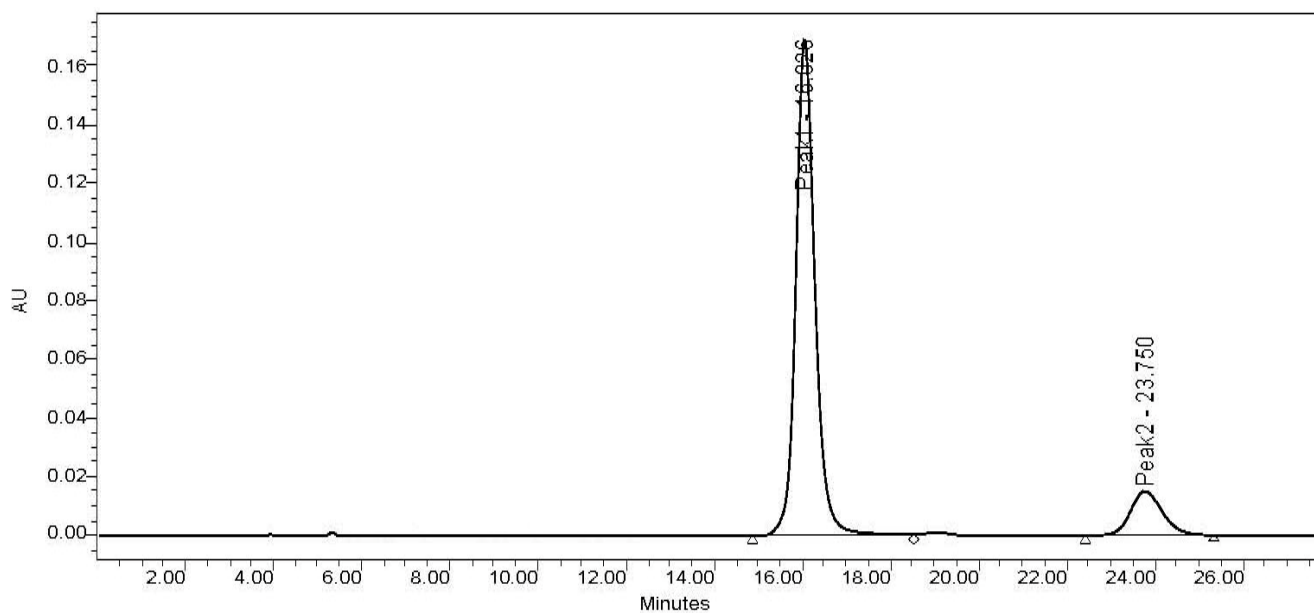

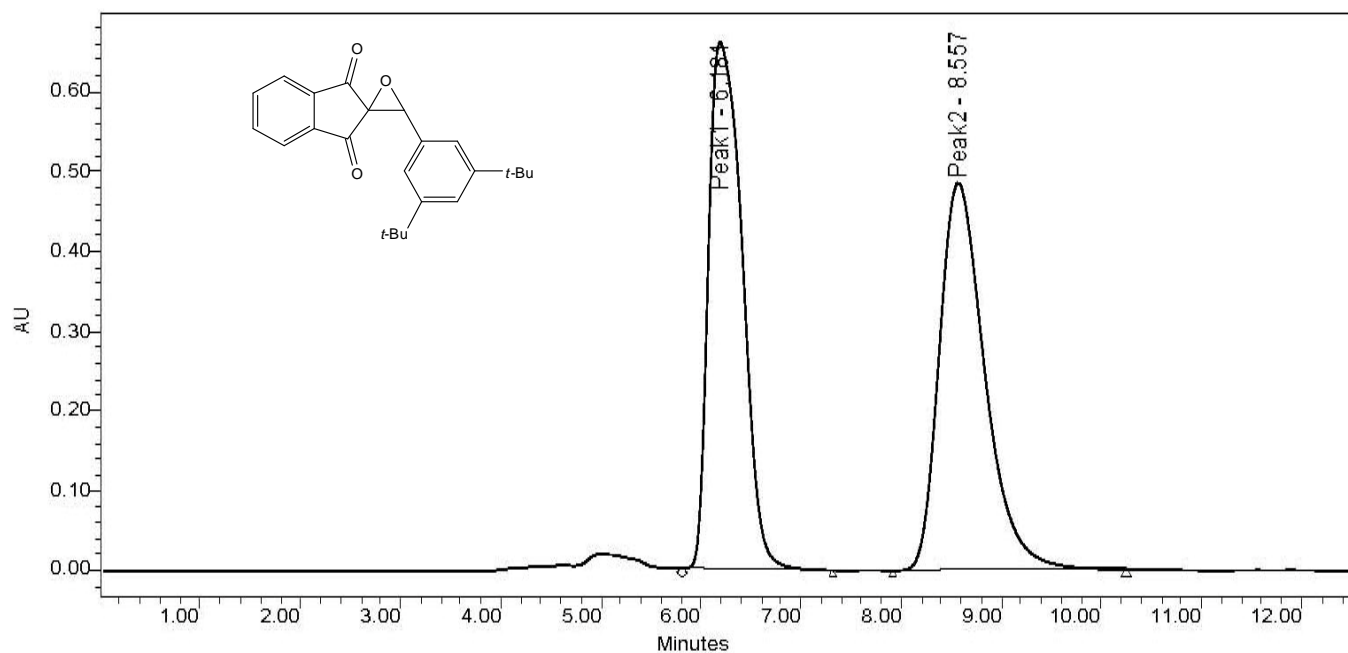

|   | Peak Name | RT (min) | Area (AU*sec) | % Area | Height (AU) | % Height |
|---|-----------|----------|---------------|--------|-------------|----------|
| 1 | Peak1     | 6.181    | 15377602      | 50.00  | 660461      | 57.61    |
| 2 | Peak2     | 8.557    | 15379591      | 50.00  | 485957      | 42.39    |

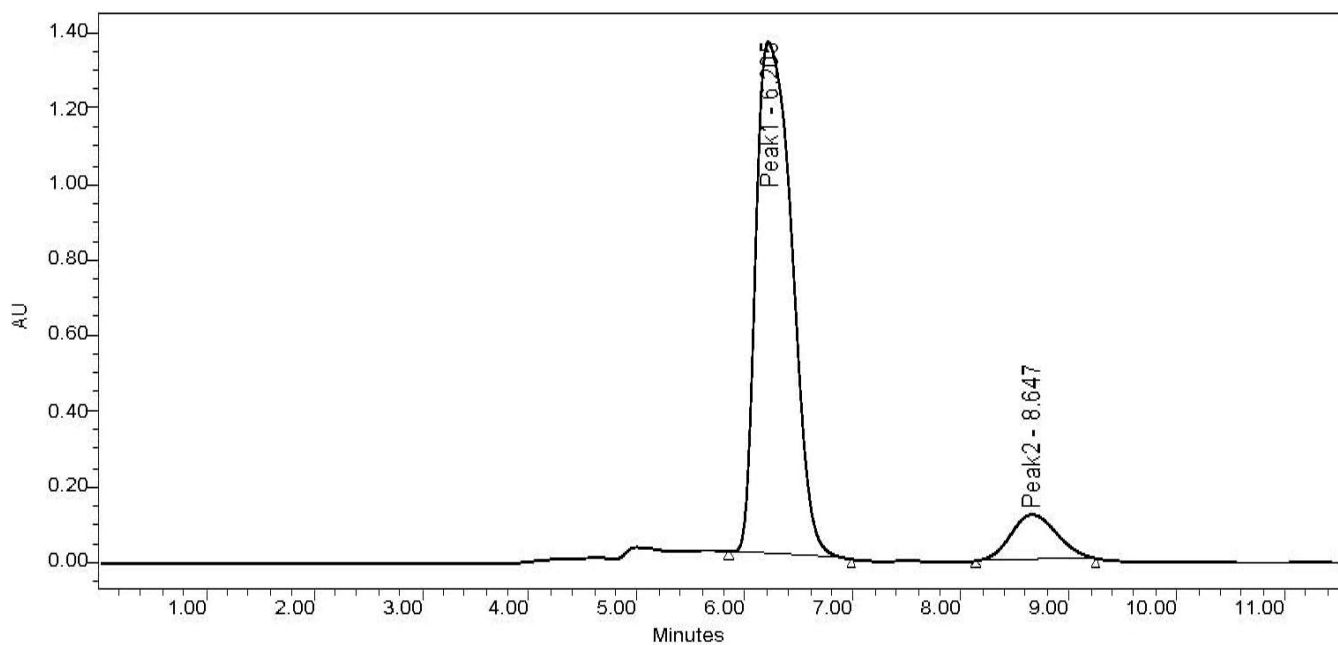

|   | Peak Name | RT (min) | Area (AU*sec) | % Area | Height (AU) | % Height |
|---|-----------|----------|---------------|--------|-------------|----------|
| 1 | Peak1     | 6.205    | 31397929      | 89.79  | 1355724     | 91.90    |
| 2 | Peak2     | 8.647    | 3569045       | 10.21  | 119461      | 8.10     |

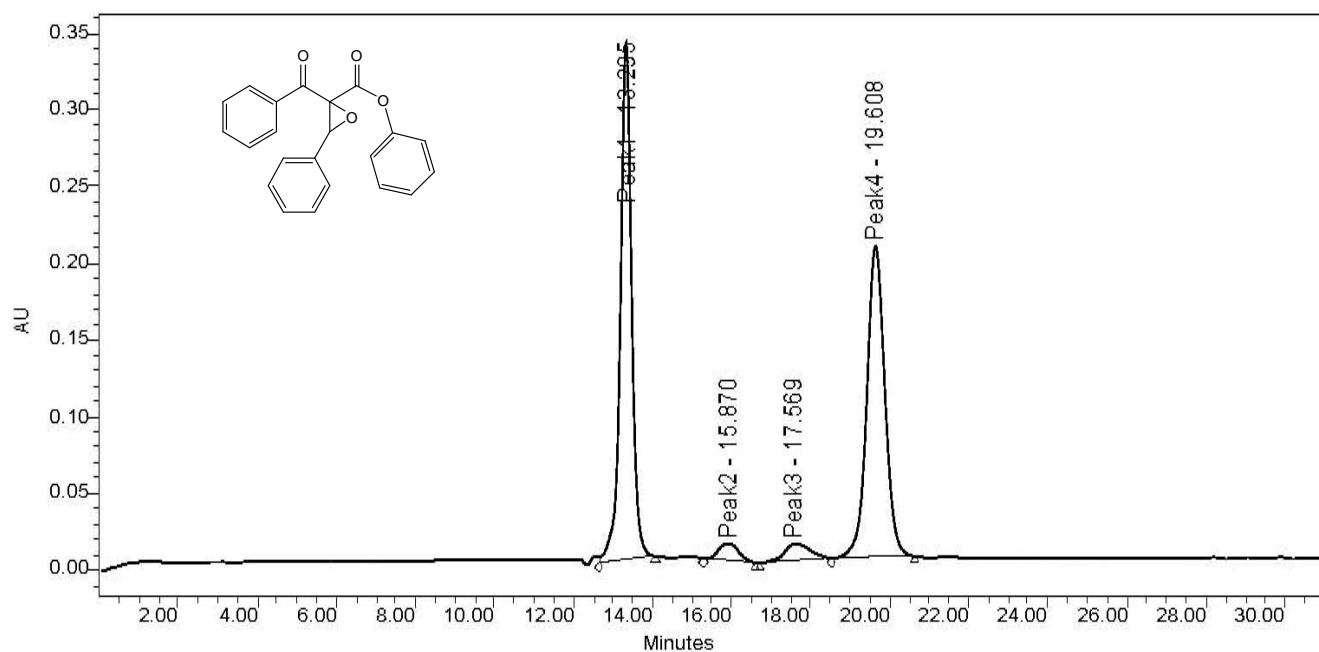

|   | Peak Name | RT (min) | Area (ΔV*sec) | % Area | Height (ΔV) | % Height |
|---|-----------|----------|---------------|--------|-------------|----------|
| 1 | Peak1     | 13.295   | 6670749       | 47.21  | 336926      | 59.85    |
| 2 | Peak2     | 15.870   | 420628        | 2.98   | 11395       | 2.02     |
| 3 | Peak3     | 17.569   | 542925        | 3.84   | 11290       | 2.01     |
| 4 | Peak4     | 19.608   | 6494253       | 45.97  | 203324      | 36.12    |

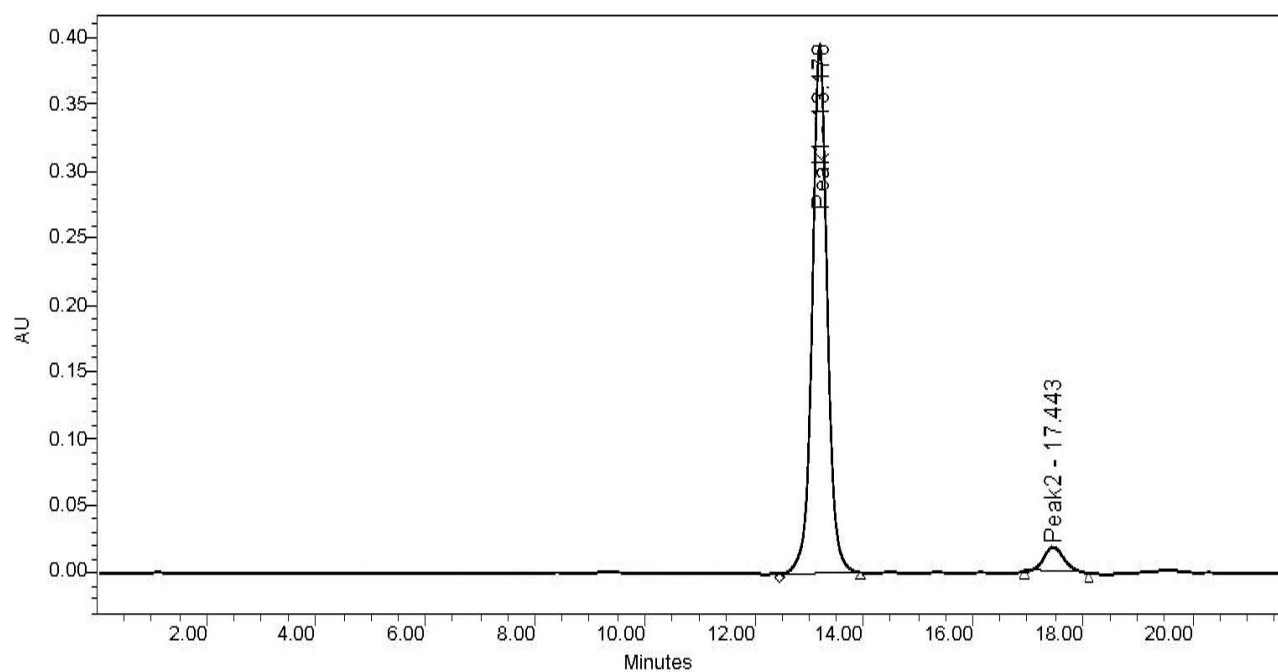

|   | Peak Name | RT (min) | Area (ΔV*sec) | % Area | Height (ΔV) | % Height |
|---|-----------|----------|---------------|--------|-------------|----------|
| 1 | Peak1     | 13.178   | 7570080       | 93.78  | 395959      | 95.47    |
| 2 | Peak2     | 17.443   | 502490        | 6.22   | 18809       | 4.53     |

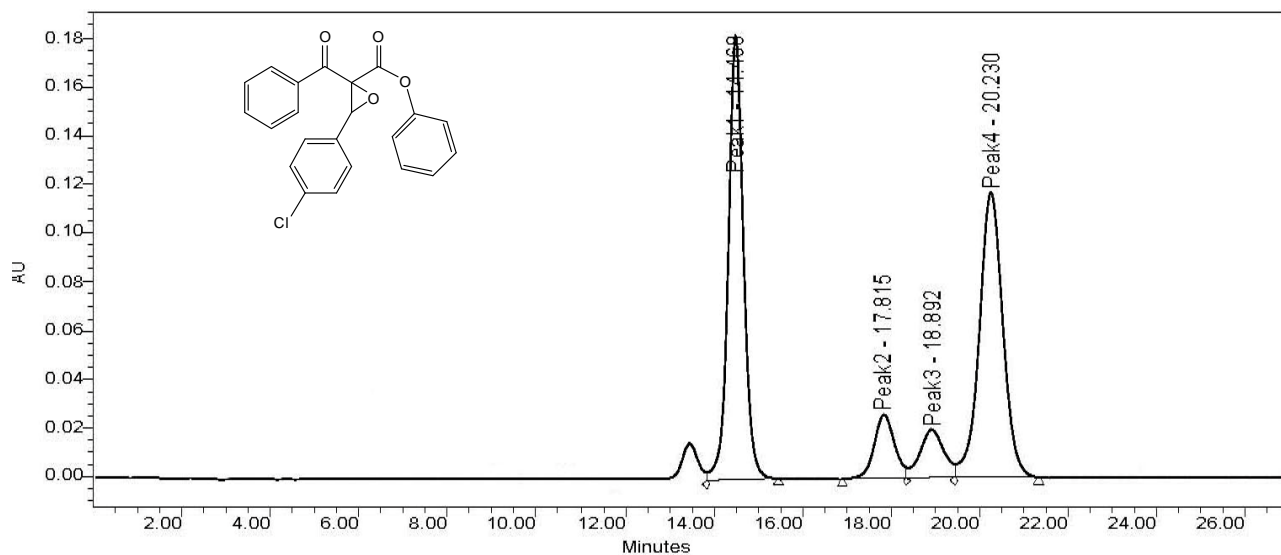

|   | Peak Name | RT (min) | Area (V*sec) | % Area | Height (V) | % Height |
|---|-----------|----------|--------------|--------|------------|----------|
| 1 | Peak1     | 14.468   | 4356028      | 42.32  | 182050     | 52.70    |
| 2 | Peak2     | 17.815   | 857911       | 8.33   | 26313      | 7.62     |
| 3 | Peak3     | 18.892   | 753402       | 7.32   | 19987      | 5.79     |
| 4 | Peak4     | 20.230   | 4325980      | 42.03  | 117120     | 33.90    |

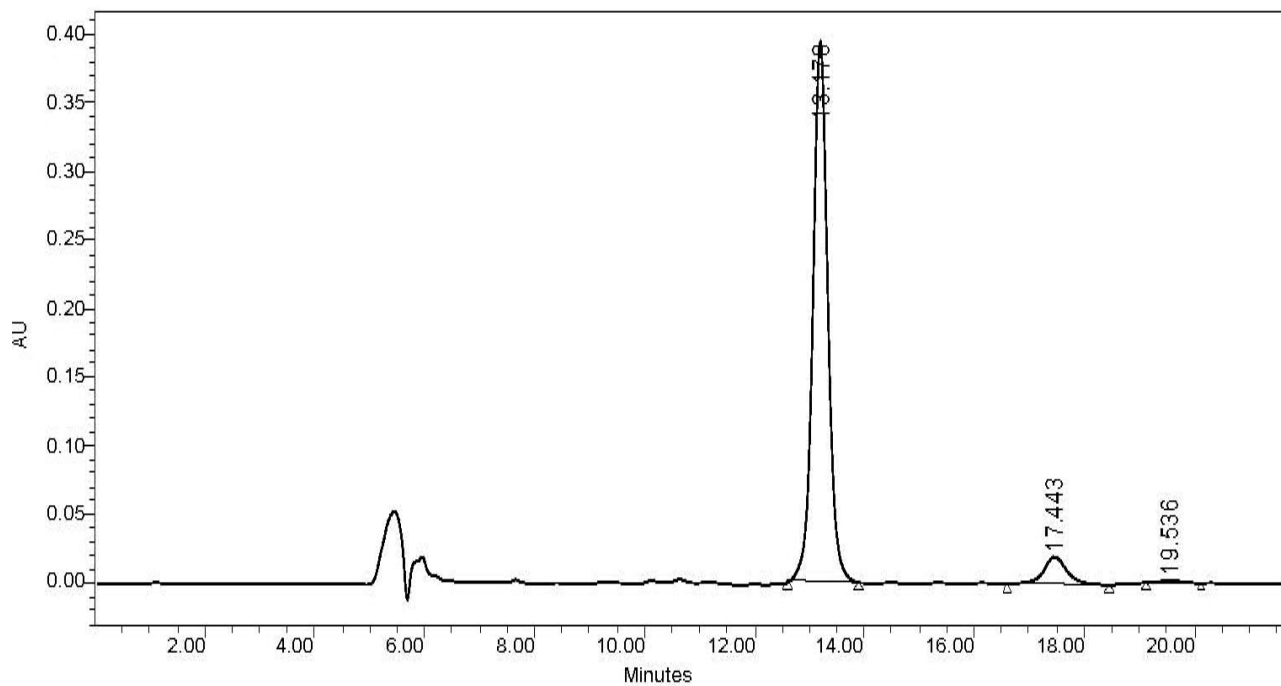

|   | RT (min) | Area (V*sec) | % Area | Height (V) | % Height |
|---|----------|--------------|--------|------------|----------|
| 1 | 13.178   | 7477953      | 91.96  | 394788     | 94.70    |
| 2 | 17.443   | 604458       | 7.43   | 20037      | 4.81     |
| 3 | 19.536   | 49701        | 0.61   | 2066       | 0.50     |
